# Supplementary material for: Hexane extract of Plumbago europaea L. aerial parts: phytochemical screening and antibacterial activity
Source: Royal Society of Chemistry journal article supplement (doi:10.1039/d5ra07370g), 2026-04-10
Supplement: d5ra07370g1.pdf [file d5ra07370g1.pdf]

ARTICLE

## Hexane extract of *Plumbago europaea* L. aerial parts: phytochemical screening and antibacterial activity

Muhannad Hasan,<sup>\*a,d</sup> Nidal Hasan,<sup>b</sup> Natalie Moussa,<sup>c</sup> Imad Hwija,<sup>d</sup> Yaseer Mossa<sup>d</sup> and Abdel Nasser Singab<sup>e</sup>

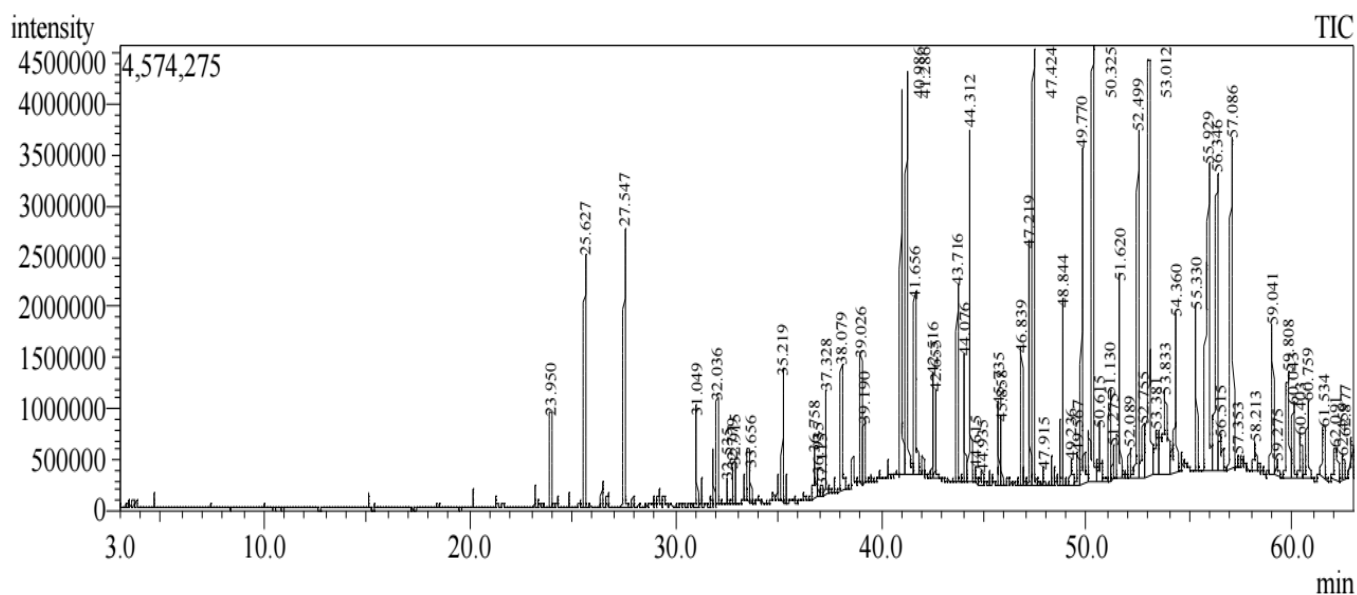

Fig. S1. The total ion chromatogram of the hexane extract of *P. europaea* L. flowers by HS/GC-MS.

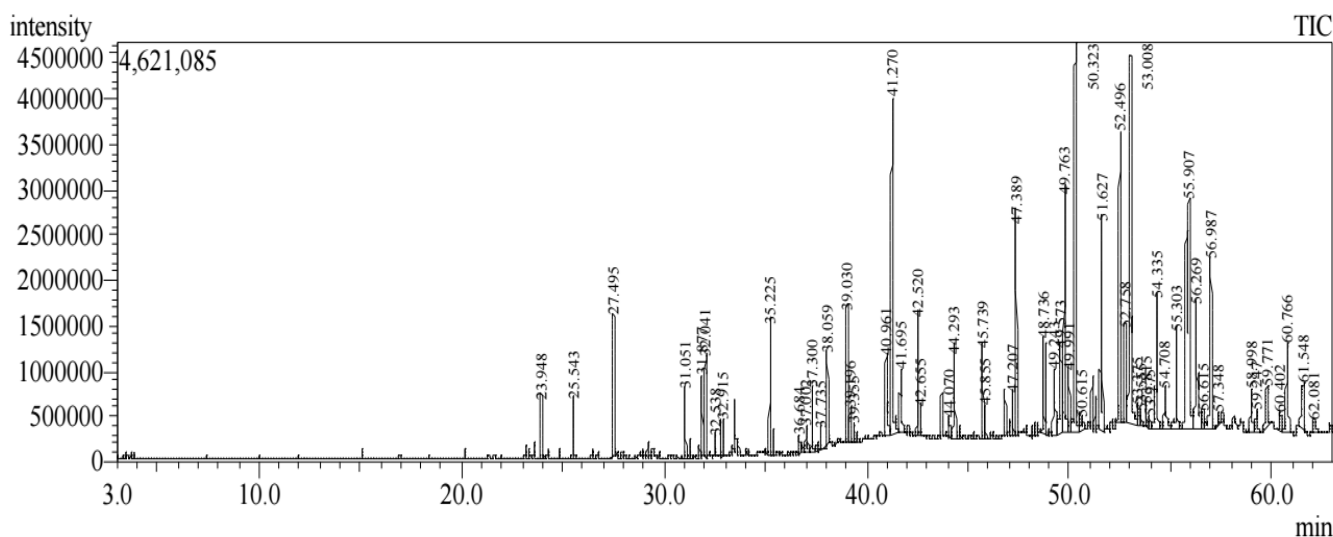

Fig. S2. The total ion chromatogram of the hexane extract of *P. europaea* L. leaves by HS/GC-MS.

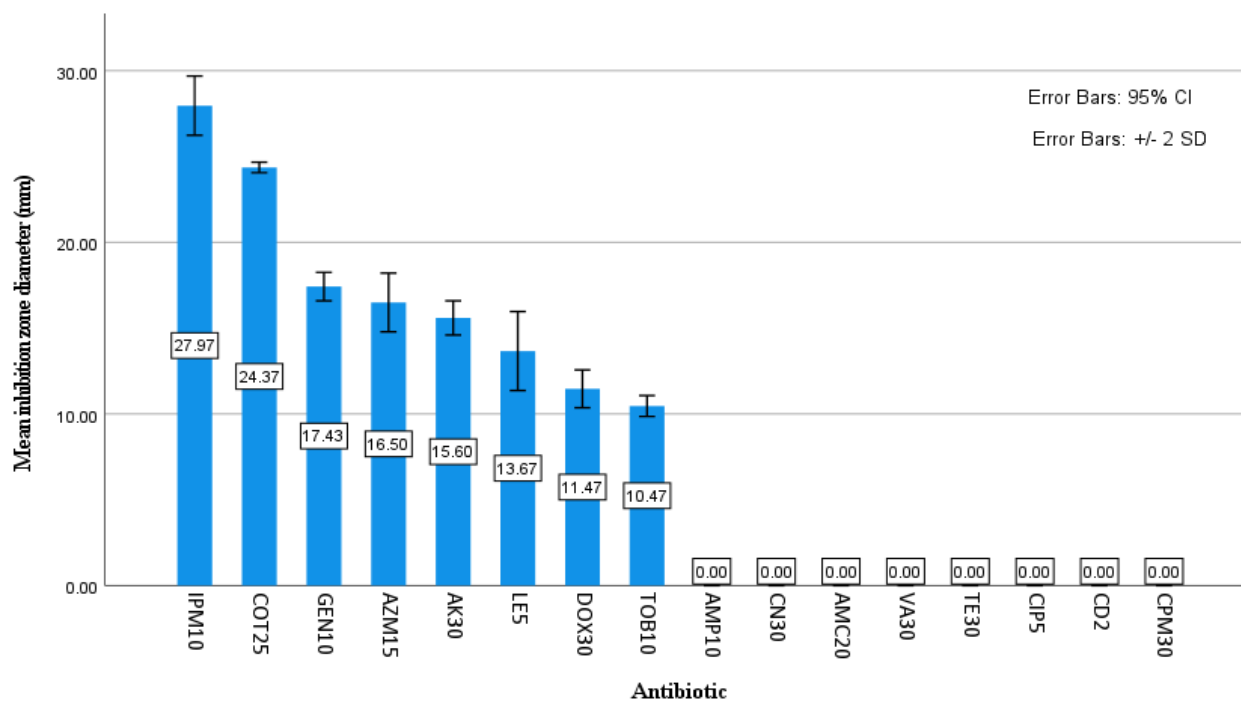

Fig. S3. The effect of active tested antibiotics on the mean inhibition zone diameters against *E. coli*

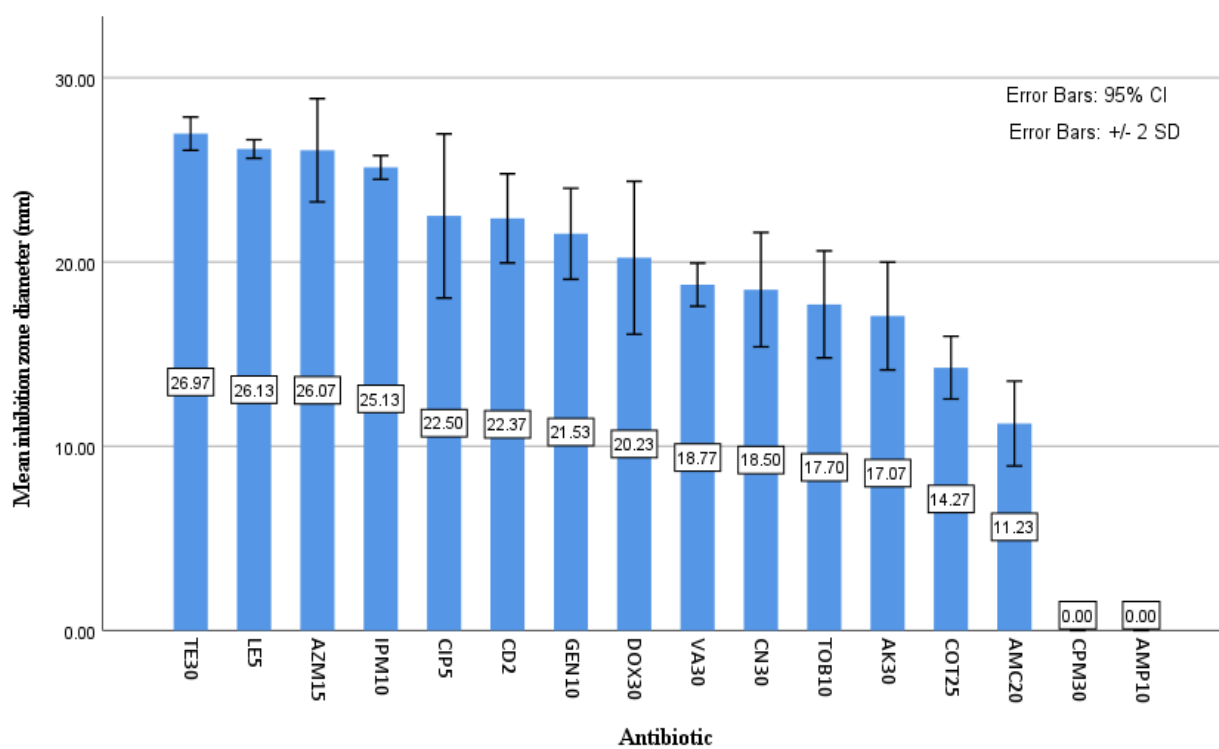

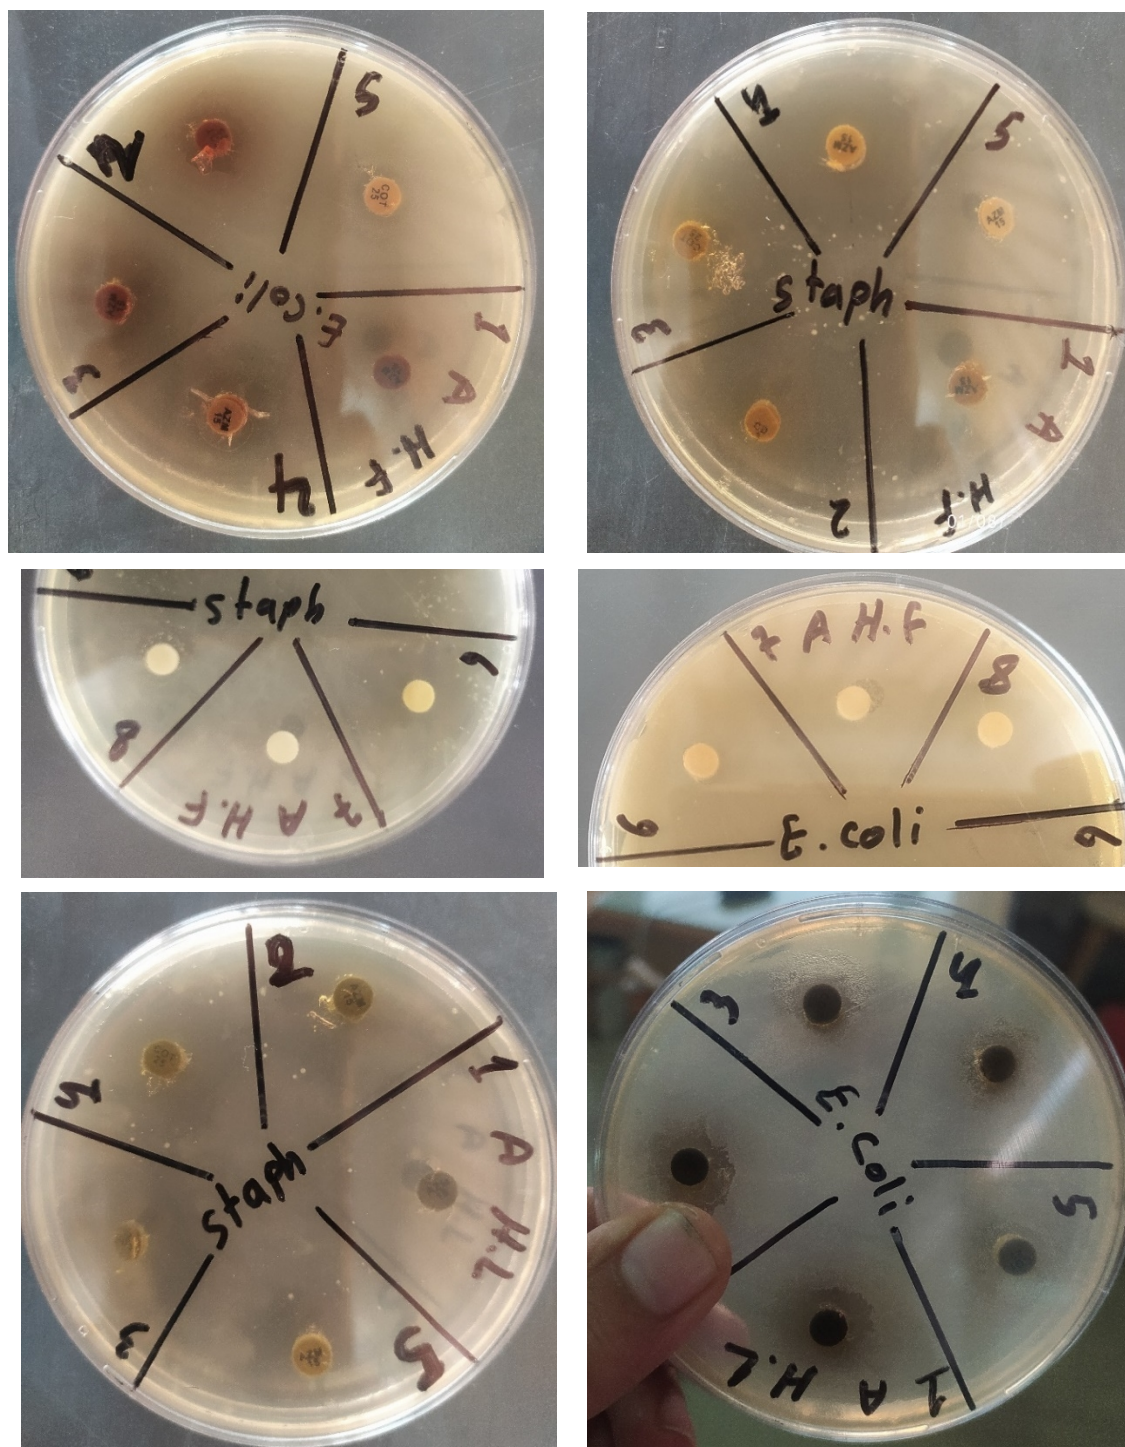

Fig. S5. Inhibitory potential of hexane extract concentrations from the aerial parts of *P. europaea* L. against the tested pathogenic bacteria

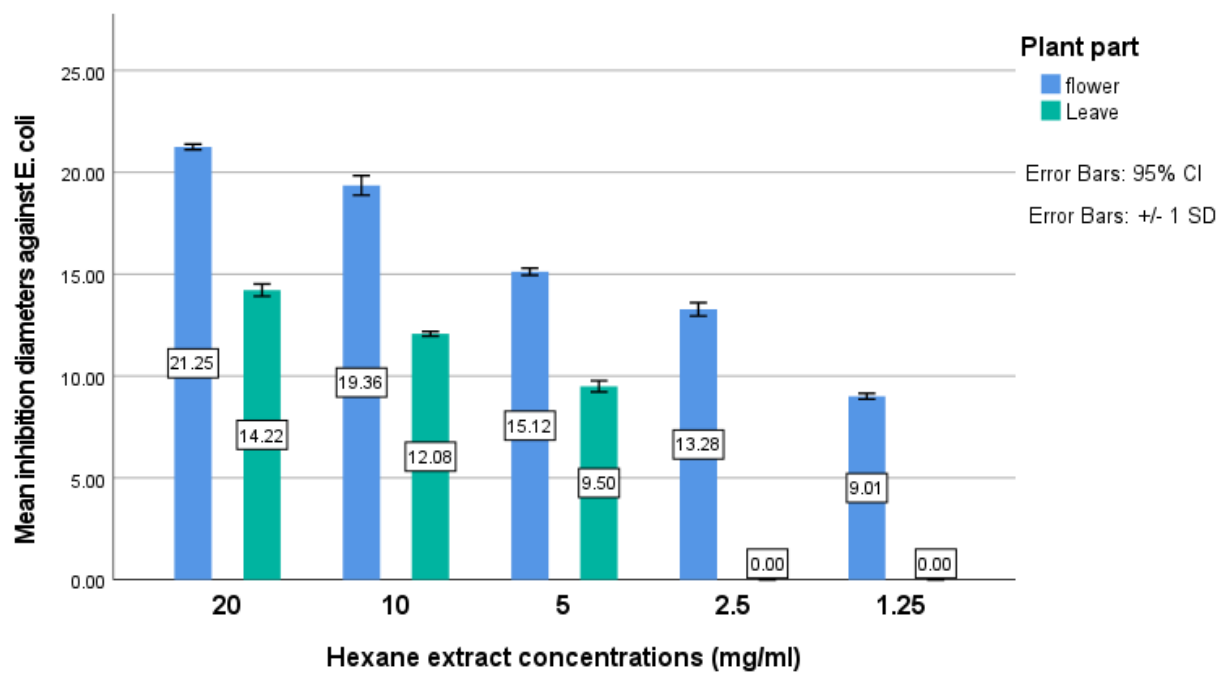

Fig. S6. Comparison of mean inhibition zone diameters of flower and leaf hexane extract concentrations against against *E. coli*

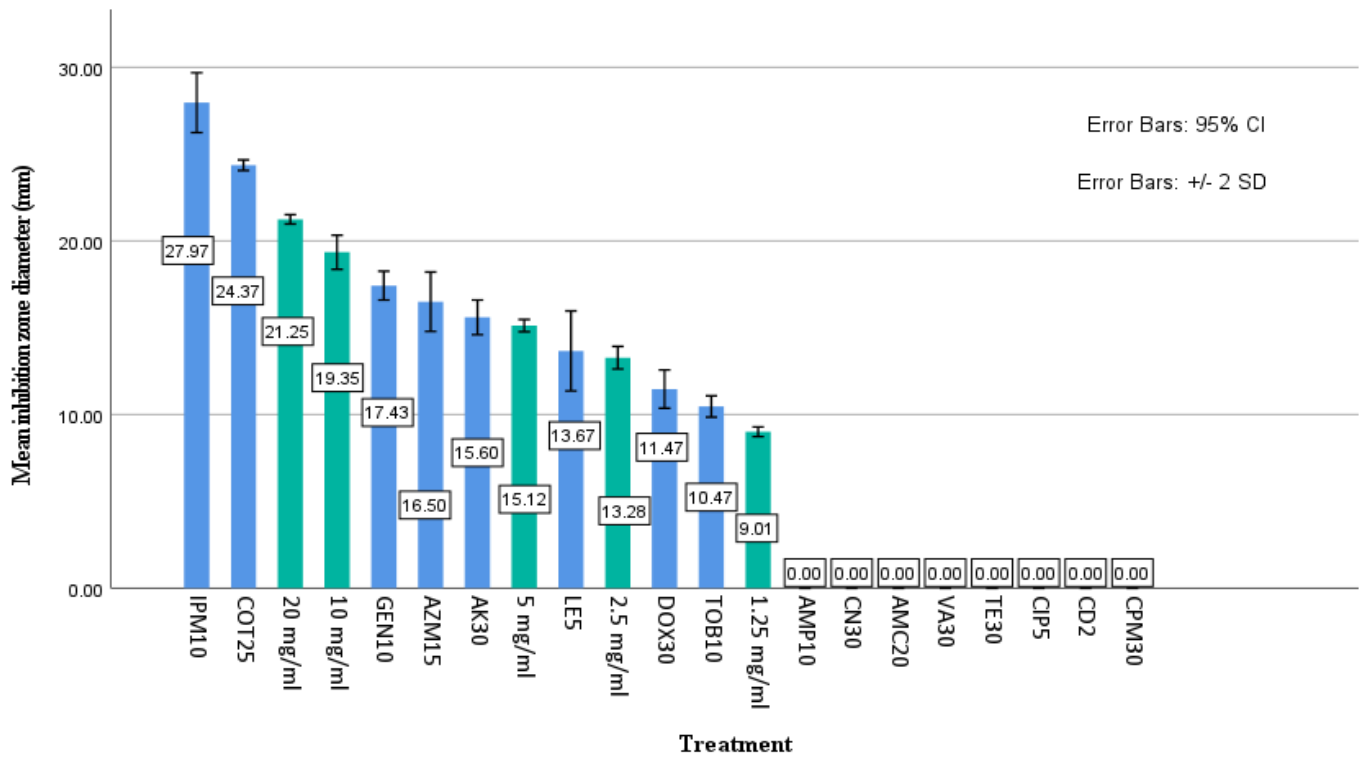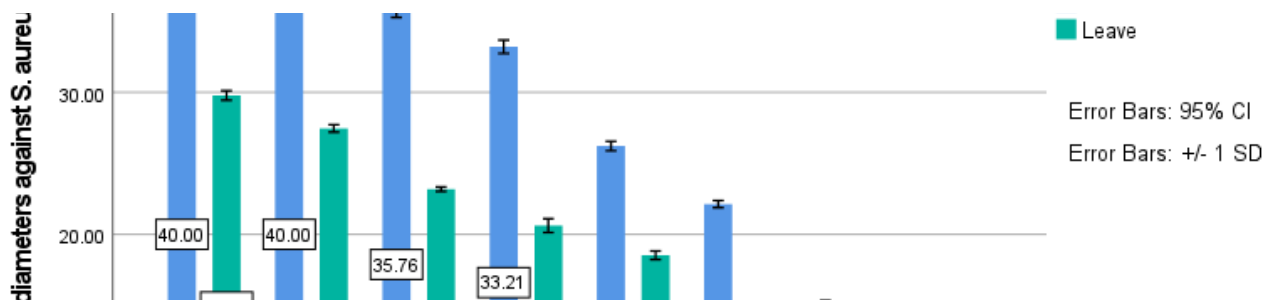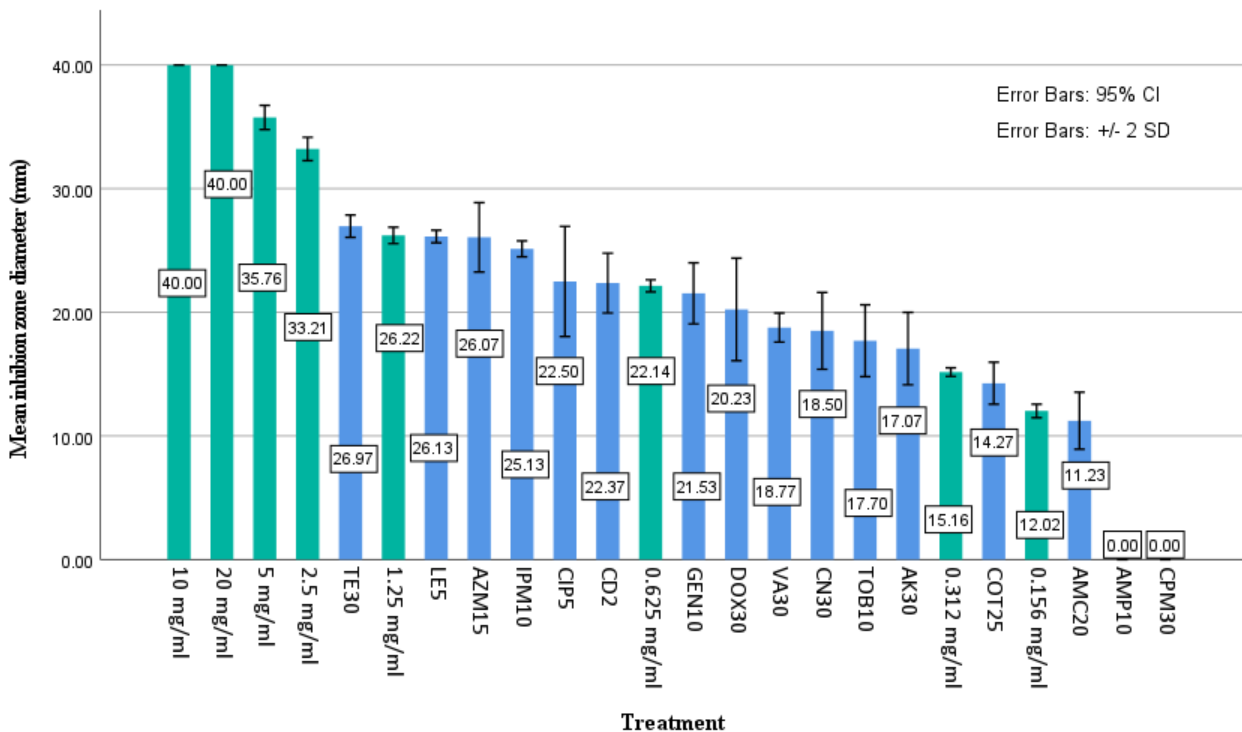

**Fig. S9.** Comparison of mean inhibition zone diameters of flower extract concentrations and antibiotics against *S. aureus*

---

**Table S1** Phytochemical profile of the hexane extract of aerial parts of *P. europaea* L.

| No | Name                                                                        | <sup>a</sup> LRI | <sup>b</sup> LRI | M.F.                                           | M.W. | Flower     | Leaf        | Class | Ref. |
|----|-----------------------------------------------------------------------------|------------------|------------------|------------------------------------------------|------|------------|-------------|-------|------|
|    |                                                                             |                  |                  |                                                |      | % ± SD     |             |       |      |
| 1  | 4,4,6-trimethyl-cyclohex-2-en-1-ol                                          | 1085             | 1080             | C <sub>9</sub> H <sub>16</sub> O               | 140  | 0.56 ± 0.0 | 0.63 ± 0.0  | O     | -    |
| 2  | citronellol                                                                 | 1179             | 1169             | C <sub>10</sub> H <sub>20</sub> O              | 156  | 2.99 ± 0.2 | 0.73 ± 0.1  | M     | 1    |
| 3  | 5,9-dimethyl decan-2-one                                                    | 1222             | 1232             | C <sub>12</sub> H <sub>24</sub> O              | 184  | 3.39 ± 0.3 | 2.20 ± 0.2  | M     | -    |
| 4  | 3-methyl-6-propyl-Phenol                                                    | 1326             | 1335             | C <sub>10</sub> H <sub>14</sub> O              | 150  | 0.55 ± 0.0 | 0.67 ± 0.1  | O     | 2    |
| 5  | 1-(prop-2-ynylloxy)-3,4-methylenedioxybenzene                               | 1403             | 1391             | C <sub>10</sub> H <sub>10</sub> O <sub>3</sub> | 178  | -          | 0.76 ± 0.0  | O     | -    |
| 6  | 2-sec-butylphenol, acetate                                                  | 1408             | 1401             | C <sub>12</sub> H <sub>16</sub> O <sub>2</sub> | 192  | 0.59 ± 0.0 | 0.99 ± 0.1  | O     | -    |
| 7  | decanamide                                                                  | 1425             | 1426             | C <sub>10</sub> H <sub>21</sub> NO             | 171  | 0.19 ± 0.0 | 0.28 ± 0.0  | FA    | 3    |
| 8  | globulol                                                                    | 1530             | 1534             | C <sub>15</sub> H <sub>26</sub> O              | 222  | 0.76 ± 0.1 | 1.34 ± 0.2  | S     | 4    |
| 9  | (-)-isolongifolol, methyl ether                                             | 1568             | 1577             | C <sub>16</sub> H <sub>28</sub> O              | 236  | 0.47 ± 0.0 | 0.36 ± 0.0  | S     | -    |
| 10 | tridecanoic acid, methyl ester                                              | 1580             | 1581             | C <sub>14</sub> H <sub>28</sub> O <sub>2</sub> | 228  | 0.17 ± 0.0 | 0.56 ± 0.1  | F     | 5    |
| 11 | γ-dodecalactone                                                             | 1582             | 1587             | C <sub>12</sub> H <sub>22</sub> O <sub>2</sub> | 198  | 0.06 ± 0.0 | -           | O     | 6    |
| 12 | pogostol                                                                    | 1601             | 1593             | C <sub>15</sub> H <sub>26</sub> O              | 222  | 0.90 ± 0.1 | 0.83 ± 0.1  | S     | 7    |
| 13 | 3-(1,5-dimethyl-hex-4-enyl)-2,2-dimethyl-cyclopent-3-enol                   | 1611             | 1610             | C <sub>15</sub> H <sub>26</sub> O              | 222  | -          | 0.46 ± 0.1  | S     | -    |
| 14 | junenol                                                                     | 1625             | 1635             | C <sub>15</sub> H <sub>26</sub> O              | 222  | 1.16 ± 0.1 | 1.14 ± 0.1  | S     | 8    |
| 15 | pentadecanal                                                                | 1701             | 1701             | C <sub>15</sub> H <sub>30</sub> O              | 226  | 0.69 ± 0.0 | 1.40 ± 0.2  | O     | 9    |
| 16 | heptadecane                                                                 | 1711             | 1709             | C <sub>17</sub> H <sub>36</sub>                | 240  | 0.41 ± 0.0 | 0.44 ± 0.0  | H     | 10   |
| 17 | 8,14-cedrandiol                                                             | 1786             | 1789             | C <sub>15</sub> H <sub>26</sub> O <sub>2</sub> | 238  | 3.22 ± 0.3 | 1.35 ± 0.3  | S     | 11   |
| 18 | plumbagin                                                                   | 1801             | 1805             | C <sub>11</sub> H <sub>8</sub> O <sub>3</sub>  | 188  | 5.67 ± 0.4 | 7.75 ± 0.3  | O     | 12   |
| 19 | tetradecanamide                                                             | 1822             | 1833             | C <sub>14</sub> H <sub>29</sub> NO             | 227  | 1.73 ± 0.2 | 1.17 ± 0.1  | FA    | 13   |
| 20 | nonadecene                                                                  | 1900             | 1901             | C <sub>19</sub> H <sub>38</sub>                | 266  | 0.65 ± 0.1 | 1.31 ± 0.1  | H     | 14   |
| 21 | (R)-(-)-14-methyl-8-hexadecyn-1-ol                                          | 1907             | 1911             | C <sub>17</sub> H <sub>32</sub> O              | 252  | 0.52 ± 0.0 | 0.35 ± 0.0  | O     | 15   |
| 22 | hexadecanoic acid, ethyl ester                                              | 1978             | 1988             | C <sub>18</sub> H <sub>36</sub> O <sub>2</sub> | 284  | 1.17 ± 0.1 | -           | F     | 16   |
| 23 | eicosane                                                                    | 2009             | 2009             | C <sub>20</sub> H <sub>42</sub>                | 282  | 0.96 ± 0.1 | 0.33 ± 0.0  | H     | 17   |
| 24 | hexadecanamide                                                              | 2021             | 2020             | C <sub>16</sub> H <sub>33</sub> NO             | 255  | 2.79 ± 0.2 | 1.52 ± 0.2  | FA    | 18   |
| 25 | phytol                                                                      | 2045             | 2050             | C <sub>20</sub> H <sub>40</sub> O              | 296  | 0.13 ± 0.0 | -           | D     | 19   |
| 26 | (E)-9-octadecenoic acid, methyl ester                                       | 2085             | 2088             | C <sub>19</sub> H <sub>36</sub> O <sub>2</sub> | 296  | 0.58 ± 0.0 | 1.03 ± 0.2  | F     | 20   |
| 27 | (E,E)-9,12-octadecadienoic acid, methyl ester                               | 2093             | 2093             | C <sub>19</sub> H <sub>34</sub> O <sub>2</sub> | 294  | 0.39 ± 0.0 | 0.32 ± 0.0  | F     | 21   |
| 28 | cyclopentanetridecanoic acid, methyl ester                                  | 2120             | 2131             | C <sub>19</sub> H <sub>36</sub> O <sub>2</sub> | 296  | 0.83 ± 0.1 | -           | F     | -    |
| 29 | 5-(7a-isopropenyl-4,5-dimethyl-octahydroinden-4-yl)-3-methyl-pent-2-en-1-ol | 2141             | 2146             | C <sub>20</sub> H <sub>34</sub> O              | 290  | 1.80 ± 0.3 | 0.55 ± 0.0  | D     | 22   |
| 30 | nonadecanol                                                                 | 2153             | 2154             | C <sub>19</sub> H <sub>40</sub> O              | 284  | 4.02 ± 0.4 | 2.42 ± 0.1  | FC    | 23   |
| 31 | 9-octadecenoic acid                                                         | 2175             | 2172             | C <sub>20</sub> H <sub>40</sub> O <sub>2</sub> | 282  | 0.15 ± 0.0 | -           | F     | 24   |
| 32 | eicosanal                                                                   | 2198             | 2206             | C <sub>20</sub> H <sub>40</sub> O              | 296  | -          | 2.07 ± 0.1  | O     | 25   |
| 33 | octadecanamide                                                              | 2220             | 2215             | C <sub>18</sub> H <sub>37</sub> NO             | 283  | 1.48 ± 0.2 | -           | FA    | 26   |
| 34 | phthalic acid, butyl hexyl ester                                            | 2235             | 2246             | C <sub>16</sub> H <sub>28</sub> O <sub>2</sub> | 306  | 0.36 ± 0.0 | 1.58 ± 0.2  | O     | 27   |
| 35 | (E)-9-octadecenoic acid, propyl ester                                       | 2284             | 2273             | C <sub>21</sub> H <sub>40</sub> O <sub>2</sub> | 324  | 0.43 ± 0.1 | 2.20 ± 0.2  | F     | -    |
| 36 | kolavenol acetate                                                           | 2290             | 2289             | C <sub>22</sub> H <sub>36</sub> O <sub>2</sub> | 332  | 2.91 ± 0.2 | 3.27 ± 0.3  | D     | -    |
| 37 | nonadecanamide                                                              | 2319             | 2308             | C <sub>19</sub> H <sub>39</sub> NO             | 297  | -          | 0.84 ± 0.1  | FA    | -    |
| 38 | heneicosanol                                                                | 2351             | 2341             | C <sub>21</sub> H <sub>44</sub> O              | 312  | 6.81 ± 0.3 | 9.00 ± 0.4  | FC    | 28   |
| 39 | phthalic acid, butyl 2-ethylhexyl ester                                     | 2370             | 2369             | C <sub>20</sub> H <sub>30</sub> O <sub>4</sub> | 334  | 0.53 ± 0.0 | 0.53 ± 0.1  | O     | 27   |
| 40 | 2-methyltetracosane                                                         | 2442             | 2433             | C <sub>25</sub> H <sub>52</sub>                | 352  | 0.21 ± 0.0 | -           | H     | 29   |
| 41 | docosanol                                                                   | 2451             | 2466             | C <sub>22</sub> H <sub>46</sub> O              | 326  | 1.62 ± 0.1 | 2.88 ± 0.2  | FC    | 30   |
| 42 | 3-cyclopentylpropionic acid, pentadecyl ester                               | 2518             | 2511             | C <sub>23</sub> H <sub>44</sub> O <sub>2</sub> | 352  | 0.34 ± 0.0 | -           | F     | -    |
| 43 | stigmasta-3,5-diene                                                         | 2525             | 2533             | C <sub>29</sub> H <sub>48</sub>                | 396  | 3.29 ± 0.2 | 4.20 ± 0.3  | ST    | 31   |
| 44 | docosyl propyl ether                                                        | 2582             | 2576             | C <sub>25</sub> H <sub>52</sub> O              | 368  | 0.65 ± 0.1 | 1.36 ± 0.1  | O     | -    |
| 45 | campesterol                                                                 | 2632             | 2623             | C <sub>28</sub> H <sub>48</sub> O              | 400  | 7.31 ± 0.4 | 10.26 ± 0.4 | ST    | 32   |
| 46 | 24-noroleana-3,12-diene                                                     | 2635             | 2634             | C <sub>29</sub> H <sub>46</sub>                | 394  | 0.91 ± 0.1 | 0.43 ± 0.1  | ST    | 33   |
| 47 | 2-methylhexacosane                                                          | 2641             | 2650             | C <sub>27</sub> H <sub>56</sub>                | 380  | -          | 0.23 ± 0.0  | H     | 34   |
| 48 | tetracosanol                                                                | 2650             | 2660             | C <sub>24</sub> H <sub>50</sub> O              | 354  | 2.62 ± 0.2 | 0.32 ± 0.1  | FC    | 28   |
| 49 | (Z,Z)-9,12-octadecadienoic acid, 2,3-dihydroxypropyl ester                  | 2697             | 2688             | C <sub>21</sub> H <sub>38</sub> O <sub>4</sub> | 354  | -          | 0.12 ± 0.0  | F     | -    |
| 50 | β-sitosterol                                                                | 2731             | 2727             | C <sub>29</sub> H <sub>50</sub> O              | 414  | 1.94 ± 0.1 | 2.52 ± 0.2  | ST    | 35   |
| 51 | tetracosyl acetate                                                          | 2773             | 2766             | C <sub>26</sub> H <sub>52</sub> O <sub>2</sub> | 396  | -          | 1.11 ± 0.1  | F     | -    |

|                            |                                              |      |      |                                                |     |            |            |    |               |
|----------------------------|----------------------------------------------|------|------|------------------------------------------------|-----|------------|------------|----|---------------|
| 52                         | octacosane                                   | 2804 | 2813 | C <sub>28</sub> H <sub>58</sub>                | 394 | 1.33 ± 0.1 | 1.75 ± 0.2 | H  | <sup>36</sup> |
| 53                         | β-amyron                                     | 2869 | 2860 | C <sub>30</sub> H <sub>48</sub> O              | 424 | 5.77 ± 0.3 | 8.33 ± 0.3 | T  | <sup>37</sup> |
| 54                         | β-amyrin                                     | 2886 | 2887 | C <sub>30</sub> H <sub>50</sub> O              | 426 | 5.67 ± 0.4 | 3.92 ± 0.3 | T  | <sup>38</sup> |
| 55                         | 2-methylnonacosane                           | 2939 | 2930 | C <sub>30</sub> H <sub>62</sub>                | 422 | 0.67 ± 0.1 | 0.32 ± 0.0 | H  | -             |
| 56                         | phytyl decanoate                             | 2963 | 2954 | C <sub>30</sub> H <sub>58</sub> O <sub>2</sub> | 450 | 6.13 ± 0.2 | 3.65 ± 0.2 | D  | -             |
| 57                         | β-amyrin acetate                             | 3025 | 3027 | C <sub>32</sub> H <sub>52</sub> O <sub>2</sub> | 468 | 0.34 ± 0.0 | -          | T  | <sup>39</sup> |
| 58                         | heptacosyl acetate                           | 3071 | 3071 | C <sub>29</sub> H <sub>58</sub> O <sub>2</sub> | 438 | 0.23 ± 0.0 | 0.53 ± 0.0 | F  | -             |
| 59                         | 2-methylhentriacontane                       | 3138 | 3131 | C <sub>32</sub> H <sub>66</sub>                | 450 | 1.05 ± 0.1 | -          | H  | -             |
| 60                         | phytyl dodecanoate                           | 3162 | 3162 | C <sub>32</sub> H <sub>62</sub> O <sub>2</sub> | 478 | 0.83 ± 0.0 | -          | D  | -             |
| 61                         | octacosyl acetate                            | 3171 | 3183 | C <sub>30</sub> H <sub>60</sub> O <sub>2</sub> | 452 | 0.76 ± 0.0 | -          | F  | -             |
| 62                         | α-tocospiro A                                | 3195 | 3198 | C <sub>29</sub> H <sub>50</sub> O <sub>4</sub> | 462 | 0.33 ± 0.0 | -          | T  | <sup>40</sup> |
| 63                         | 3',4'-dihydrocholest-1-eno[2,1-a]naphthalene | 3265 | 3256 | C <sub>35</sub> H <sub>52</sub>                | 472 | 0.20 ± 0.0 | -          | ST | -             |
| Total                      |                                              |      |      |                                                |     | 92.22      | 92.67      |    |               |
| Hydrocarbons               |                                              |      |      |                                                |     | 5.28       | 4.38       |    |               |
| Monoterpenes               |                                              |      |      |                                                |     | 6.38       | 2.93       |    |               |
| Sesquiterpenes             |                                              |      |      |                                                |     | 6.51       | 5.48       |    |               |
| Diterpenes                 |                                              |      |      |                                                |     | 11.8       | 7.47       |    |               |
| Triterpenoids              |                                              |      |      |                                                |     | 12.11      | 12.25      |    |               |
| Steroids                   |                                              |      |      |                                                |     | 13.65      | 17.77      |    |               |
| Fatty amides               |                                              |      |      |                                                |     | 6.19       | 3.81       |    |               |
| Fatty acids & Esters       |                                              |      |      |                                                |     | 5.05       | 5.87       |    |               |
| Fatty Alcohol              |                                              |      |      |                                                |     | 15.07      | 14.62      |    |               |
| Other oxygenated compounds |                                              |      |      |                                                |     | 10.18      | 18.09      |    |               |

<sup>a</sup>LRI: calculated retention index, <sup>b</sup>LRI: retention index according to Adams literature and the NIST library, M.F.: Molecular formula, M.W.: Molecule weight, % ± SD: mean ± standard deviation (n = 3), Class: Classification compound, H: Hydrocarbons, M: Monoterpenes, S: Sesquiterpenes, D: Diterpenes, T: Triterpenoids, ST: Steroids, FC: Fatty Alcohol, FA: Fatty amides, F: Fatty acids & Esters, O: Other oxygenated compounds. Ref.: references listed in this column correspond to studies reporting antibacterial activity of the compounds.

**Table S2. Two-way ANOVA** for the effects of antibiotic type and bacterial species on the mean inhibition zone diameter.

| Source                 | SS       | df       | MS       | F        | P      | η <sup>2</sup> | OP    |
|------------------------|----------|----------|----------|----------|--------|----------------|-------|
| Antibiotics            | 5174.395 | 15       | 344.960  | 369.491  | <0.001 | 0.989          | 1.000 |
| Bacteria               | 2223.568 | 1        | 2223.568 | 2381.692 | <0.001 | 0.974          | 1.000 |
| Antibiotics × Bacteria | 2384.901 | 15       | 158.993  | 170.300  | <0.001 | 0.976          | 1.000 |
| Error                  | 59.751   | 64       | 0.934    | —        | —      | —              | —     |
| Corrected Total        | 9842.615 | 95       | —        | —        | —      | —              | —     |
| Levene's Test (Median) | —        | df1 = 31 | df2 = 64 | —        | 0.116  | —              | —     |

a. R Squared = .994 (Adjusted R Squared = .991)

SS: Sum of Squares; MS: Mean Square; η<sup>2</sup>: partial eta squared (effect size); OP: Observed Power. Values represent Type III sums of squares. All effects were evaluated at α = 0.05. Levene's test (based on the median) indicated that the assumption of homogeneity of variances was satisfied. Unless otherwise stated, all ANOVA tables use the same abbreviations and statistical conventions.

**Table S3. One-way ANOVA** for the effect of antibiotic type on the mean inhibition zone diameter of *E. coli*.

| Source                 | SS       | df       | MS      | F        | P      | η <sup>2</sup> | OP    |
|------------------------|----------|----------|---------|----------|--------|----------------|-------|
| Between Groups         | 4326.083 | 15       | 288.406 | 1268.135 | <0.001 | 0.998          | 1.000 |
| Within Groups          | 7.278    | 32       | 0.227   | —        | —      | —              | —     |
| Total                  | 4333.361 | 47       | —       | —        | —      | —              | —     |
| Levene's Test (Median) | —        | df1 = 15 | df2 = 9 | —        | 0.097  | —              | —     |

**Table S4. Tukey's HSD** pairwise comparisons of antibiotics on the inhibition zone diameter of *E. coli*

| Comparison |         | Mean Difference | Std. Error | P     | 95% Confidence Interval |             |
|------------|---------|-----------------|------------|-------|-------------------------|-------------|
| Anti. I    | Anti. J |                 |            |       | Lower Bound             | Upper Bound |
|            | VA30    | .00000          | .38938     | 1.000 | -1.4439-                | 1.4439      |

|  |       |             |        |        |           |           |
|--|-------|-------------|--------|--------|-----------|-----------|
|  | AMC20 | .00000      | .38938 | 1.000  | -1.4439-  | 1.4439    |
|  | COT25 | -24.36667-* | .38938 | <0.001 | -25.8105- | -22.9228- |
|  | GEN10 | -17.42667-* | .38938 | <0.001 | -18.8705- | -15.9828- |
|  | CN30  | .00000      | .38938 | 1.000  | -1.4439-  | 1.4439    |
|  | LE5   | -13.66667-* | .38938 | <0.001 | -15.1105- | -12.2228- |
|  | IPM10 | -27.96667-* | .38938 | <0.001 | -29.4105- | -26.5228- |
|  | AMP10 | .00000      | .38938 | 1.000  | -1.4439-  | 1.4439    |
|  | TOB10 | -10.46667-* | .38938 | <0.001 | -11.9105- | -9.0228-  |
|  | CD2   | .00000      | .38938 | 1.000  | -1.4439-  | 1.4439    |
|  | DOX30 | -11.46667-* | .38938 | <0.001 | -12.9105- | -10.0228- |
|  | AK30  | -15.60000-* | .38938 | <0.001 | -17.0439- | -14.1561- |
|  | CIP5  | .00000      | .38938 | 1.000  | -1.4439-  | 1.4439    |
|  | AZM15 | -16.50000-* | .38938 | <0.001 | -17.9439- | -15.0561- |
|  | TE30  | .00000      | .38938 | 1.000  | -1.4439-  | 1.4439    |
|  | AMC20 | .00000      | .38938 | 1.000  | -1.4439-  | 1.4439    |
|  | COT25 | -24.36667-* | .38938 | <0.001 | -25.8105- | -22.9228- |
|  | GEN10 | -17.42667-* | .38938 | <0.001 | -18.8705- | -15.9828- |
|  | CN30  | .00000      | .38938 | 1.000  | -1.4439-  | 1.4439    |
|  | LE5   | -13.66667-* | .38938 | <0.001 | -15.1105- | -12.2228- |
|  | IPM10 | -27.96667-* | .38938 | <0.001 | -29.4105- | -26.5228- |
|  | AMP10 | .00000      | .38938 | 1.000  | -1.4439-  | 1.4439    |
|  | TOB10 | -10.46667-* | .38938 | <0.001 | -11.9105- | -9.0228-  |
|  | CD2   | .00000      | .38938 | 1.000  | -1.4439-  | 1.4439    |
|  | DOX30 | -11.46667-* | .38938 | <0.001 | -12.9105- | -10.0228- |
|  | AK30  | -15.60000-* | .38938 | <0.001 | -17.0439- | -14.1561- |
|  | CIP5  | .00000      | .38938 | 1.000  | -1.4439-  | 1.4439    |
|  | AZM15 | -16.50000-* | .38938 | <0.001 | -17.9439- | -15.0561- |
|  | TE30  | .00000      | .38938 | 1.000  | -1.4439-  | 1.4439    |
|  | COT25 | -24.36667-* | .38938 | <0.001 | -25.8105- | -22.9228- |
|  | GEN10 | -17.42667-* | .38938 | <0.001 | -18.8705- | -15.9828- |
|  | CN30  | .00000      | .38938 | 1.000  | -1.4439-  | 1.4439    |
|  | LE5   | -13.66667-* | .38938 | <0.001 | -15.1105- | -12.2228- |
|  | IPM10 | -27.96667-* | .38938 | <0.001 | -29.4105- | -26.5228- |
|  | AMP10 | .00000      | .38938 | 1.000  | -1.4439-  | 1.4439    |
|  | TOB10 | -10.46667-* | .38938 | <0.001 | -11.9105- | -9.0228-  |
|  | CD2   | .00000      | .38938 | 1.000  | -1.4439-  | 1.4439    |
|  | DOX30 | -11.46667-* | .38938 | <0.001 | -12.9105- | -10.0228- |
|  | AK30  | -15.60000-* | .38938 | <0.001 | -17.0439- | -14.1561- |
|  | CIP5  | .00000      | .38938 | 1.000  | -1.4439-  | 1.4439    |
|  | AZM15 | -16.50000-* | .38938 | <0.001 | -17.9439- | -15.0561- |
|  | TE30  | .00000      | .38938 | 1.000  | -1.4439-  | 1.4439    |
|  | GEN10 | 6.94000*    | .38938 | <0.001 | 5.4961    | 8.3839    |
|  | CN30  | 24.36667*   | .38938 | <0.001 | 22.9228   | 25.8105   |
|  | LE5   | 10.70000*   | .38938 | <0.001 | 9.2561    | 12.1439   |
|  | IPM10 | -3.60000-*  | .38938 | <0.001 | -5.0439-  | -2.1561-  |
|  | AMP10 | 24.36667*   | .38938 | <0.001 | 22.9228   | 25.8105   |
|  | TOB10 | 13.90000*   | .38938 | <0.001 | 12.4561   | 15.3439   |
|  | CD2   | 24.36667*   | .38938 | <0.001 | 22.9228   | 25.8105   |
|  | DOX30 | 12.90000*   | .38938 | <0.001 | 11.4561   | 14.3439   |
|  | AK30  | 8.76667*    | .38938 | <0.001 | 7.3228    | 10.2105   |
|  | CIP5  | 24.36667*   | .38938 | <0.001 | 22.9228   | 25.8105   |
|  | AZM15 | 7.86667*    | .38938 | <0.001 | 6.4228    | 9.3105    |
|  | TE30  | 24.36667*   | .38938 | <0.001 | 22.9228   | 25.8105   |
|  | CN30  | 17.42667*   | .38938 | <0.001 | 15.9828   | 18.8705   |
|  | LE5   | 3.76000*    | .38938 | <0.001 | 2.3161    | 5.2039    |
|  | IPM10 | -10.54000-* | .38938 | <0.001 | -11.9839- | -9.0961-  |
|  | AMP10 | 17.42667*   | .38938 | <0.001 | 15.9828   | 18.8705   |
|  | TOB10 | 6.96000*    | .38938 | <0.001 | 5.5161    | 8.4039    |
|  | CD2   | 17.42667*   | .38938 | <0.001 | 15.9828   | 18.8705   |

| ARTICLE |       |             |        |        | Journal Name |
|---------|-------|-------------|--------|--------|--------------|
|         | DOX30 | 5.96000*    | .38938 | <0.001 | 7.4039       |
|         | AK30  | 1.82667*    | .38938 | .004   | 3.2705       |
|         | CIP5  | 17.42667*   | .38938 | <0.001 | 18.8705      |
|         | AZM15 | .92667      | .38938 | .574   | 2.3705       |
|         | TE30  | 17.42667*   | .38938 | <0.001 | 18.8705      |
|         | LE5   | -13.66667-* | .38938 | <0.001 | -12.2228-    |
|         | IPM10 | -27.96667-* | .38938 | <0.001 | -26.5228-    |
|         | AMP10 | .00000      | .38938 | 1.000  | 1.4439       |
|         | TOB10 | -10.46667-* | .38938 | <0.001 | -9.0228-     |
|         | CD2   | .00000      | .38938 | 1.000  | 1.4439       |
| CN30    | DOX30 | -11.46667-* | .38938 | <0.001 | -10.0228-    |
|         | AK30  | -15.60000-* | .38938 | <0.001 | -14.1561-    |
|         | CIP5  | .00000      | .38938 | 1.000  | 1.4439       |
|         | AZM15 | -16.50000-* | .38938 | <0.001 | -15.0561-    |
|         | TE30  | .00000      | .38938 | 1.000  | 1.4439       |
|         | IPM10 | -14.30000-* | .38938 | <0.001 | -12.8561-    |
|         | AMP10 | 13.66667*   | .38938 | <0.001 | 15.1105      |
|         | TOB10 | 3.20000*    | .38938 | <0.001 | 4.6439       |
|         | CD2   | 13.66667*   | .38938 | <0.001 | 15.1105      |
| LE5     | DOX30 | 2.20000*    | .38938 | <0.001 | 3.6439       |
|         | AK30  | -1.93333-*  | .38938 | .002   | -.4895-      |
|         | CIP5  | 13.66667*   | .38938 | <0.001 | 15.1105      |
|         | AZM15 | -2.83333-*  | .38938 | <0.001 | -1.3895-     |
|         | TE30  | 13.66667*   | .38938 | <0.001 | 15.1105      |
|         | AMP10 | 27.96667*   | .38938 | <0.001 | 29.4105      |
|         | TOB10 | 17.50000*   | .38938 | <0.001 | 18.9439      |
|         | CD2   | 27.96667*   | .38938 | <0.001 | 29.4105      |
| IPM10   | DOX30 | 16.50000*   | .38938 | <0.001 | 17.9439      |
|         | AK30  | 12.36667*   | .38938 | <0.001 | 13.8105      |
|         | CIP5  | 27.96667*   | .38938 | <0.001 | 29.4105      |
|         | AZM15 | 11.46667*   | .38938 | <0.001 | 12.9105      |
|         | TE30  | 27.96667*   | .38938 | <0.001 | 29.4105      |
|         | TOB10 | -10.46667-* | .38938 | <0.001 | -9.0228-     |
|         | CD2   | .00000      | .38938 | 1.000  | 1.4439       |
|         | DOX30 | -11.46667-* | .38938 | <0.001 | -10.0228-    |
|         | AK30  | -15.60000-* | .38938 | <0.001 | -14.1561-    |
|         | CIP5  | .00000      | .38938 | 1.000  | 1.4439       |
|         | AZM15 | -16.50000-* | .38938 | <0.001 | -15.0561-    |
|         | TE30  | .00000      | .38938 | 1.000  | 1.4439       |
|         | CD2   | 10.46667*   | .38938 | <0.001 | 11.9105      |
|         | DOX30 | -1.00000-   | .38938 | .452   | .4439        |
|         | AK30  | -5.13333-*  | .38938 | <0.001 | -3.6895-     |
|         | CIP5  | 10.46667*   | .38938 | <0.001 | 11.9105      |
|         | AZM15 | -6.03333-*  | .38938 | <0.001 | -4.5895-     |
|         | TE30  | 10.46667*   | .38938 | <0.001 | 11.9105      |
|         | DOX30 | -11.46667-* | .38938 | <0.001 | -10.0228-    |
|         | AK30  | -15.60000-* | .38938 | <0.001 | -14.1561-    |
|         | CIP5  | .00000      | .38938 | 1.000  | 1.4439       |
|         | AZM15 | -16.50000-* | .38938 | <0.001 | -15.0561-    |
|         | TE30  | .00000      | .38938 | 1.000  | 1.4439       |
|         | AK30  | -4.13333-*  | .38938 | <0.001 | -2.6895-     |
|         | CIP5  | 11.46667*   | .38938 | <0.001 | 12.9105      |
|         | AZM15 | -5.03333-*  | .38938 | <0.001 | -3.5895-     |
|         | TE30  | 11.46667*   | .38938 | <0.001 | 12.9105      |
|         | CIP5  | 15.60000*   | .38938 | <0.001 | 17.0439      |
|         | AZM15 | -.90000-    | .38938 | .619   | .5439        |
|         | TE30  | 15.60000*   | .38938 | <0.001 | 17.0439      |
|         | AZM15 | -16.50000-* | .38938 | <0.001 | -15.0561-    |
|         | TE30  | .00000      | .38938 | 1.000  | 1.4439       |

|       |      |           |        |        |         |         |
|-------|------|-----------|--------|--------|---------|---------|
| AZM15 | TE30 | 16.50000* | .38938 | <0.001 | 15.0561 | 17.9439 |
|-------|------|-----------|--------|--------|---------|---------|

\*: indicate pairwise differences that are statistically significant according to Tukey's HSD test at  $\alpha = 0.05$ . Positive mean differences indicate higher inhibition at the first antibiotic (Anti. I) compared to the second (Anti. J). Unless otherwise stated, all Tukey HSD test comparison tables use the same interpretive conventions.

**Table S5** Tukey's HSD homogeneous groups for the antibiotic effects on the inhibition zone diameter of *E. coli*

| Antibiotic | N | Subset for $\alpha = 0.05$ |       |       |       |       |       |       |
|------------|---|----------------------------|-------|-------|-------|-------|-------|-------|
|            |   | 1                          | 2     | 3     | 4     | 5     | 6     | 7     |
| CPM30      | 3 | 0.00                       |       |       |       |       |       |       |
| VA30       | 3 | 0.00                       |       |       |       |       |       |       |
| AMC20      | 3 | 0.00                       |       |       |       |       |       |       |
| CN30       | 3 | 0.00                       |       |       |       |       |       |       |
| AMP10      | 3 | 0.00                       |       |       |       |       |       |       |
| CD2        | 3 | 0.00                       |       |       |       |       |       |       |
| CIP5       | 3 | 0.00                       |       |       |       |       |       |       |
| TE30       | 3 | 0.00                       |       |       |       |       |       |       |
| TOB10      | 3 |                            | 10.47 |       |       |       |       |       |
| DOX30      | 3 |                            | 11.47 |       |       |       |       |       |
| LE5        | 3 |                            |       | 13.67 |       |       |       |       |
| AK30       | 3 |                            |       |       | 15.60 |       |       |       |
| AZM15      | 3 |                            |       |       | 16.50 | 16.50 |       |       |
| GEN10      | 3 |                            |       |       |       | 17.43 |       |       |
| COT25      | 3 |                            |       |       |       |       | 24.37 |       |
| IPM10      | 3 |                            |       |       |       |       |       | 27.97 |
| <i>P</i>   |   | 1.000                      | .452  | 1.000 | .619  | .574  | 1.000 | 1.000 |

Means represent homogeneous subsets identified by Tukey's HSD test; antibiotics within the same subset do not differ significantly in their inhibition levels. Higher mean values correspond to greater inhibition. Unless otherwise stated, all tables presenting Tukey HSD homogeneous groups use the same abbreviations and interpretive conventions.

**Table S6.** One-way ANOVA for the effect of antibiotic type on the mean inhibition zone diameter of *S. aureus*.

| Source                 | SS       | df       | MS       | F       | P      | $\eta^2$ | OP    |
|------------------------|----------|----------|----------|---------|--------|----------|-------|
| Between Groups         | 3086.426 | 15       | 205.762  | 139.283 | <0.001 | 0.985    | 1.000 |
| Within Groups          | 47.273   | 32       | 1.477    | —       | —      | —        | —     |
| Total                  | 4333.361 | 47       | —        | —       | —      | —        | —     |
| Levene's Test (Median) | —        | df1 = 15 | df2 = 16 | —       | 0.442  | —        | —     |

**Table S7.** Tukey's HSD pairwise comparisons of antibiotics on the inhibition zone diameter of *S. aureus*.

| Comparison |         | Mean Difference | Std. Error | <i>P</i> | 95% Confidence Interval |             |
|------------|---------|-----------------|------------|----------|-------------------------|-------------|
| Anti. I    | Anti. J |                 |            |          | Lower Bound             | Upper Bound |
| COT25      | VA30    | -18.76667-*     | .99240     | <0.001   | -22.4466-               | -15.0868-   |
|            | AMC20   | -11.23333-*     | .99240     | <0.001   | -14.9132-               | -7.5534-    |
|            | COT25   | -14.26667-*     | .99240     | <0.001   | -17.9466-               | -10.5868-   |
|            | GEN10   | -21.53333-*     | .99240     | <0.001   | -25.2132-               | -17.8534-   |
|            | CN30    | -18.50000-*     | .99240     | <0.001   | -22.1799-               | -14.8201-   |
|            | LE5     | -26.13333-*     | .99240     | <0.001   | -29.8132-               | -22.4534-   |
|            | IPM10   | -25.13333-*     | .99240     | <0.001   | -28.8132-               | -21.4534-   |
|            | AMP10   | .00000          | .99240     | 1.000    | -3.6799-                | 3.6799      |
|            | TOB10   | -17.70000-*     | .99240     | <0.001   | -21.3799-               | -14.0201-   |
|            | CD2     | -22.36667-*     | .99240     | <0.001   | -26.0466-               | -18.6868-   |
| COT25      | DOX30   | -20.23333-*     | .99240     | <0.001   | -23.9132-               | -16.5534-   |
|            | AK30    | -17.06667-*     | .99240     | <0.001   | -20.7466-               | -13.3868-   |
|            | CIP5    | -22.50000-*     | .99240     | <0.001   | -26.1799-               | -18.8201-   |
|            | AZM15   | -26.06667-*     | .99240     | <0.001   | -29.7466-               | -22.3868-   |

## ARTICLE

## Journal Name

|       |       |                         |                         |        |           |           |           |
|-------|-------|-------------------------|-------------------------|--------|-----------|-----------|-----------|
| VA30  | TE30  | -26.96667 <sup>-*</sup> | .99240                  | <0.001 | -30.6466- | -23.2868- |           |
|       | AMC20 | 7.53333 <sup>*</sup>    | .99240                  | <0.001 | 3.8534    | 11.2132   |           |
|       | COT25 | 4.50000 <sup>*</sup>    | .99240                  | .006   | .8201     | 8.1799    |           |
|       | GEN10 | -2.76667-               | .99240                  | .324   | -6.4466-  | .9132     |           |
|       | CN30  | .26667                  | .99240                  | 1.000  | -3.4132-  | 3.9466    |           |
|       | LE5   | -7.36667 <sup>-*</sup>  | .99240                  | <0.001 | -11.0466- | -3.6868-  |           |
|       | IPM10 | -6.36667 <sup>-*</sup>  | .99240                  | <0.001 | -10.0466- | -2.6868-  |           |
|       | AMP10 | 18.76667 <sup>*</sup>   | .99240                  | <0.001 | 15.0868   | 22.4466   |           |
|       | TOB10 | 1.06667                 | .99240                  | .999   | -2.6132-  | 4.7466    |           |
|       | CD2   | -3.60000-               | .99240                  | .060   | -7.2799-  | .0799     |           |
|       | DOX30 | -1.46667-               | .99240                  | .977   | -5.1466-  | 2.2132    |           |
|       | AK30  | 1.70000                 | .99240                  | .928   | -1.9799-  | 5.3799    |           |
|       | CIP5  | -3.73333 <sup>-*</sup>  | .99240                  | .044   | -7.4132-  | -.0534-   |           |
|       | AZM15 | -7.30000 <sup>-*</sup>  | .99240                  | <0.001 | -10.9799- | -3.6201-  |           |
|       | TE30  | -8.20000 <sup>-*</sup>  | .99240                  | <0.001 | -11.8799- | -4.5201-  |           |
|       | AMC20 | COT25                   | -3.03333-               | .99240 | .202      | -6.7132-  | .6466     |
| GEN10 |       | -10.30000 <sup>-*</sup> | .99240                  | <0.001 | -13.9799- | -6.6201-  |           |
| CN30  |       | -7.26667 <sup>-*</sup>  | .99240                  | <0.001 | -10.9466- | -3.5868-  |           |
| LE5   |       | -14.90000 <sup>-*</sup> | .99240                  | <0.001 | -18.5799- | -11.2201- |           |
| IPM10 |       | -13.90000 <sup>-*</sup> | .99240                  | <0.001 | -17.5799- | -10.2201- |           |
| AMP10 |       | 11.23333 <sup>*</sup>   | .99240                  | <0.001 | 7.5534    | 14.9132   |           |
| TOB10 |       | -6.46667 <sup>-*</sup>  | .99240                  | <0.001 | -10.1466- | -2.7868-  |           |
| CD2   |       | -11.13333 <sup>-*</sup> | .99240                  | <0.001 | -14.8132- | -7.4534-  |           |
| DOX30 |       | -9.00000 <sup>-*</sup>  | .99240                  | <0.001 | -12.6799- | -5.3201-  |           |
| AK30  |       | -5.83333 <sup>-*</sup>  | .99240                  | <0.001 | -9.5132-  | -2.1534-  |           |
| CIP5  |       | -11.26667 <sup>-*</sup> | .99240                  | <0.001 | -14.9466- | -7.5868-  |           |
| AZM15 |       | -14.83333 <sup>-*</sup> | .99240                  | <0.001 | -18.5132- | -11.1534- |           |
| TE30  |       | -15.73333 <sup>-*</sup> | .99240                  | <0.001 | -19.4132- | -12.0534- |           |
| GEN10 |       | -7.26667 <sup>-*</sup>  | .99240                  | <0.001 | -10.9466- | -3.5868-  |           |
| CN30  |       | -4.23333 <sup>-*</sup>  | .99240                  | .013   | -7.9132-  | -.5534-   |           |
| COT25 |       | LE5                     | -11.86667 <sup>-*</sup> | .99240 | <0.001    | -15.5466- | -8.1868-  |
|       | IPM10 | -10.86667 <sup>-*</sup> | .99240                  | <0.001 | -14.5466- | -7.1868-  |           |
|       | AMP10 | 14.26667 <sup>*</sup>   | .99240                  | <0.001 | 10.5868   | 17.9466   |           |
|       | TOB10 | -3.43333-               | .99240                  | .088   | -7.1132-  | .2466     |           |
|       | CD2   | -8.10000 <sup>-*</sup>  | .99240                  | <0.001 | -11.7799- | -4.4201-  |           |
|       | DOX30 | -5.96667 <sup>-*</sup>  | .99240                  | <0.001 | -9.6466-  | -2.2868-  |           |
|       | AK30  | -2.80000-               | .99240                  | .307   | -6.4799-  | .8799     |           |
|       | CIP5  | -8.23333 <sup>-*</sup>  | .99240                  | <0.001 | -11.9132- | -4.5534-  |           |
|       | AZM15 | -11.80000 <sup>-*</sup> | .99240                  | <0.001 | -15.4799- | -8.1201-  |           |
|       | TE30  | -12.70000 <sup>-*</sup> | .99240                  | <0.001 | -16.3799- | -9.0201-  |           |
|       | CN30  | 3.03333                 | .99240                  | .202   | -.6466-   | 6.7132    |           |
|       | LE5   | -4.60000 <sup>-*</sup>  | .99240                  | .005   | -8.2799-  | -.9201-   |           |
|       | IPM10 | -3.60000-               | .99240                  | .060   | -7.2799-  | .0799     |           |
|       | AMP10 | 21.53333 <sup>*</sup>   | .99240                  | <0.001 | 17.8534   | 25.2132   |           |
|       | TOB10 | 3.83333 <sup>*</sup>    | .99240                  | .035   | .1534     | 7.5132    |           |
|       | GEN10 | CD2                     | -.83333-                | .99240 | 1.000     | -4.5132-  | 2.8466    |
| DOX30 |       | 1.30000                 | .99240                  | .992   | -2.3799-  | 4.9799    |           |
| AK30  |       | 4.46667 <sup>*</sup>    | .99240                  | .007   | .7868     | 8.1466    |           |
| CIP5  |       | -.96667-                | .99240                  | 1.000  | -4.6466-  | 2.7132    |           |
| AZM15 |       | -4.53333 <sup>-*</sup>  | .99240                  | .006   | -8.2132-  | -.8534-   |           |
| TE30  |       | -5.43333 <sup>-*</sup>  | .99240                  | <0.001 | -9.1132-  | -1.7534-  |           |
| LE5   |       | -7.63333 <sup>-*</sup>  | .99240                  | <0.001 | -11.3132- | -3.9534-  |           |
| IPM10 |       | -6.63333 <sup>-*</sup>  | .99240                  | <0.001 | -10.3132- | -2.9534-  |           |
| AMP10 |       | 18.50000 <sup>*</sup>   | .99240                  | <0.001 | 14.8201   | 22.1799   |           |
| TOB10 |       | .80000                  | .99240                  | 1.000  | -2.8799-  | 4.4799    |           |
| CD2   |       | -3.86667 <sup>-*</sup>  | .99240                  | .032   | -7.5466-  | -.1868-   |           |
| DOX30 |       | -1.73333-               | .99240                  | .918   | -5.4132-  | 1.9466    |           |
| AK30  |       | 1.43333                 | .99240                  | .982   | -2.2466-  | 5.1132    |           |
| CIP5  |       | -4.00000 <sup>-*</sup>  | .99240                  | .023   | -7.6799-  | -.3201-   |           |
| CN30  |       | TE30                    | -26.96667 <sup>-*</sup> | .99240 | <0.001    | -30.6466- | -23.2868- |
|       |       | AMC20                   | 7.53333 <sup>*</sup>    | .99240 | <0.001    | 3.8534    | 11.2132   |
|       | COT25 | 4.50000 <sup>*</sup>    | .99240                  | .006   | .8201     | 8.1799    |           |
|       | GEN10 | -2.76667-               | .99240                  | .324   | -6.4466-  | .9132     |           |
|       | CN30  | .26667                  | .99240                  | 1.000  | -3.4132-  | 3.9466    |           |
|       | LE5   | -7.36667 <sup>-*</sup>  | .99240                  | <0.001 | -11.0466- | -3.6868-  |           |
|       | IPM10 | -6.36667 <sup>-*</sup>  | .99240                  | <0.001 | -10.0466- | -2.6868-  |           |
|       | AMP10 | 18.76667 <sup>*</sup>   | .99240                  | <0.001 | 15.0868   | 22.4466   |           |
|       | TOB10 | 1.06667                 | .99240                  | .999   | -2.6132-  | 4.7466    |           |
|       | CD2   | -3.60000-               | .99240                  | .060   | -7.2799-  | .0799     |           |
|       | DOX30 | -1.46667-               | .99240                  | .977   | -5.1466-  | 2.2132    |           |
|       | AK30  | 1.70000                 | .99240                  | .928   | -1.9799-  | 5.3799    |           |
|       | CIP5  | -3.73333 <sup>-*</sup>  | .99240                  | .044   | -7.4132-  | -.0534-   |           |
|       | AZM15 | -7.30000 <sup>-*</sup>  | .99240                  | <0.001 | -10.9799- | -3.6201-  |           |
|       | TE30  | -8.20000 <sup>-*</sup>  | .99240                  | <0.001 | -11.8799- | -4.5201-  |           |

|       |       |                        |        |        |           |           |
|-------|-------|------------------------|--------|--------|-----------|-----------|
|       | AZM15 | -7.56667 <sup>*</sup>  | .99240 | <0.001 | -11.2466- | -3.8868-  |
|       | TE30  | -8.46667 <sup>*</sup>  | .99240 | <0.001 | -12.1466- | -4.7868-  |
|       | IPM10 | 1.00000                | .99240 | 1.000  | -2.6799-  | 4.6799    |
|       | AMP10 | 26.13333 <sup>*</sup>  | .99240 | <0.001 | 22.4534   | 29.8132   |
|       | TOB10 | 8.43333 <sup>*</sup>   | .99240 | <0.001 | 4.7534    | 12.1132   |
|       | CD2   | 3.76667 <sup>*</sup>   | .99240 | .041   | .0868     | 7.4466    |
| LE5   | DOX30 | 5.90000 <sup>*</sup>   | .99240 | <0.001 | 2.2201    | 9.5799    |
|       | AK30  | 9.06667 <sup>*</sup>   | .99240 | <0.001 | 5.3868    | 12.7466   |
|       | CIP5  | 3.63333                | .99240 | .056   | -.0466-   | 7.3132    |
|       | AZM15 | .06667                 | .99240 | 1.000  | -3.6132-  | 3.7466    |
|       | TE30  | -.83333-               | .99240 | 1.000  | -4.5132-  | 2.8466    |
|       | AMP10 | 25.13333 <sup>*</sup>  | .99240 | <0.001 | 21.4534   | 28.8132   |
|       | TOB10 | 7.43333 <sup>*</sup>   | .99240 | <0.001 | 3.7534    | 11.1132   |
|       | CD2   | 2.76667                | .99240 | .324   | -.9132-   | 6.4466    |
|       | DOX30 | 4.90000 <sup>*</sup>   | .99240 | .002   | 1.2201    | 8.5799    |
| IPM10 | AK30  | 8.06667 <sup>*</sup>   | .99240 | <0.001 | 4.3868    | 11.7466   |
|       | CIP5  | 2.63333                | .99240 | .400   | -1.0466-  | 6.3132    |
|       | AZM15 | -.93333-               | .99240 | 1.000  | -4.6132-  | 2.7466    |
|       | TE30  | -1.83333-              | .99240 | .880   | -5.5132-  | 1.8466    |
|       | TOB10 | -17.70000 <sup>*</sup> | .99240 | <0.001 | -21.3799- | -14.0201- |
|       | CD2   | -22.36667 <sup>*</sup> | .99240 | <0.001 | -26.0466- | -18.6868- |
|       | DOX30 | -20.23333 <sup>*</sup> | .99240 | <0.001 | -23.9132- | -16.5534- |
| AMP10 | AK30  | -17.06667 <sup>*</sup> | .99240 | <0.001 | -20.7466- | -13.3868- |
|       | CIP5  | -22.50000 <sup>*</sup> | .99240 | <0.001 | -26.1799- | -18.8201- |
|       | AZM15 | -26.06667 <sup>*</sup> | .99240 | <0.001 | -29.7466- | -22.3868- |
|       | TE30  | -26.96667 <sup>*</sup> | .99240 | <0.001 | -30.6466- | -23.2868- |
|       | CD2   | -4.66667 <sup>*</sup>  | .99240 | .004   | -8.3466-  | -.9868-   |
|       | DOX30 | -2.53333-              | .99240 | .462   | -6.2132-  | 1.1466    |
|       | AK30  | .63333                 | .99240 | 1.000  | -3.0466-  | 4.3132    |
| TOB10 | CIP5  | -4.80000 <sup>*</sup>  | .99240 | .003   | -8.4799-  | -1.1201-  |
|       | AZM15 | -8.36667 <sup>*</sup>  | .99240 | <0.001 | -12.0466- | -4.6868-  |
|       | TE30  | -9.26667 <sup>*</sup>  | .99240 | <0.001 | -12.9466- | -5.5868-  |
|       | DOX30 | 2.13333                | .99240 | .722   | -1.5466-  | 5.8132    |
|       | AK30  | 5.30000 <sup>*</sup>   | .99240 | .001   | 1.6201    | 8.9799    |
| CD2   | CIP5  | -.13333-               | .99240 | 1.000  | -3.8132-  | 3.5466    |
|       | AZM15 | -3.70000 <sup>*</sup>  | .99240 | .048   | -7.3799-  | -.0201-   |
|       | TE30  | -4.60000 <sup>*</sup>  | .99240 | .005   | -8.2799-  | -.9201-   |
|       | AK30  | 3.16667                | .99240 | .155   | -.5132-   | 6.8466    |
|       | CIP5  | -2.26667-              | .99240 | .637   | -5.9466-  | 1.4132    |
| DOX30 | AZM15 | -5.83333 <sup>*</sup>  | .99240 | <0.001 | -9.5132-  | -2.1534-  |
|       | TE30  | -6.73333 <sup>*</sup>  | .99240 | <0.001 | -10.4132- | -3.0534-  |
|       | CIP5  | -5.43333 <sup>*</sup>  | .99240 | <0.001 | -9.1132-  | -1.7534-  |
| AK30  | AZM15 | -9.00000 <sup>*</sup>  | .99240 | <0.001 | -12.6799- | -5.3201-  |
|       | TE30  | -9.90000 <sup>*</sup>  | .99240 | <0.001 | -13.5799- | -6.2201-  |
|       | AZM15 | -3.56667-              | .99240 | .065   | -7.2466-  | .1132     |
| CIP5  | TE30  | -4.46667 <sup>*</sup>  | .99240 | .007   | -8.1466-  | -.7868-   |
| AZM15 | TE30  | -.90000-               | .99240 | 1.000  | -4.5799-  | 2.7799    |

Table S8. Tukey's HSD homogeneous groups for the antibiotic effects on the inhibition zone diameter of *S. aureus*.

| Antibiotic | N | Subset for $\alpha = 0.05$ |       |       |       |   |   |   |   |   |    |
|------------|---|----------------------------|-------|-------|-------|---|---|---|---|---|----|
|            |   | 1                          | 2     | 3     | 4     | 5 | 6 | 7 | 8 | 9 | 10 |
| CPM30      | 3 | 0.00                       | —     | —     | —     | — | — | — | — | — | —  |
| AMP10      | 3 | 0.00                       | —     | —     | —     | — | — | — | — | — | —  |
| AMC20      | 3 | —                          | 11.23 | —     | —     | — | — | — | — | — | —  |
| COT25      | 3 | —                          | 14.27 | 14.27 | —     | — | — | — | — | — | —  |
| AK30       | 3 | —                          | —     | 17.07 | 17.07 | — | — | — | — | — | —  |

|          |   |       |      |       |       |       |       |       |       |       |       |
|----------|---|-------|------|-------|-------|-------|-------|-------|-------|-------|-------|
| TOB10    | 3 | —     | —    | 17.70 | 17.70 | —     | —     | —     | —     | —     | —     |
| CN30     | 3 | —     | —    | —     | 18.50 | 18.50 | —     | —     | —     | —     | —     |
| VA30     | 3 | —     | —    | —     | 18.77 | 18.77 | 18.77 | —     | —     | —     | —     |
| DOX30    | 3 | —     | —    | —     | 20.23 | 20.23 | 20.23 | 20.23 | —     | —     | —     |
| GEN10    | 3 | —     | —    | —     | —     | 21.53 | 21.53 | 21.53 | 21.53 | —     | —     |
| CD2      | 3 | —     | —    | —     | —     | —     | 22.37 | 22.37 | 22.37 | —     | —     |
| CIP5     | 3 | —     | —    | —     | —     | —     | —     | 22.50 | 22.50 | 22.50 | —     |
| IPM10    | 3 | —     | —    | —     | —     | —     | —     | —     | 25.13 | 25.13 | 25.13 |
| AZM15    | 3 | —     | —    | —     | —     | —     | —     | —     | —     | 26.07 | 26.07 |
| LE5      | 3 | —     | —    | —     | —     | —     | —     | —     | —     | 26.13 | 26.13 |
| TE30     | 3 | —     | —    | —     | —     | —     | —     | —     | —     | —     | 26.97 |
| <i>P</i> |   | 1.000 | .202 | .088  | .155  | .202  | .060  | .637  | .060  | .056  | .880  |

**Table S9. Three-way ANOVA** for the interactive effects of concentration, plant part, and bacterial species on the mean inhibition zone diameter.

| Source                                | <i>SS</i> | <i>df</i>        | <i>MS</i>        | <i>F</i>  | <i>P</i> | $\eta^2$ | <i>OP</i> |
|---------------------------------------|-----------|------------------|------------------|-----------|----------|----------|-----------|
| Concentration                         | 3490.555  | 7                | 498.651          | 6106.577  | <0.001   | 0.999    | 1.000     |
| Plant Part                            | 1439.522  | 1                | 1439.522         | 17628.680 | <0.001   | 0.997    | 1.000     |
| Bacteria                              | 4905.285  | 1                | 4905.285         | 60071.111 | <0.001   | 0.999    | 1.000     |
| Concentration × Plant Part            | 41.154    | 4                | 10.288           | 125.994   | <0.001   | 0.916    | 1.000     |
| Concentration × Bacteria              | 20.092    | 4                | 5.023            | 61.513    | <0.001   | 0.842    | 1.000     |
| Plant Part × Bacteria                 | 27.486    | 1                | 27.486           | 336.602   | <0.001   | 0.880    | 1.000     |
| Concentration × Plant Part × Bacteria | 40.298    | 4                | 10.074           | 123.374   | <0.001   | 0.915    | 1.000     |
| Error                                 | 3.756     | 46               | 0.082            | —         | —        | —        | —         |
| Corrected Total                       | 8146.811  | 68               | —                | —         | —        | —        | —         |
| Levene's Test (Median)                | —         | <i>df</i> 1 = 22 | <i>df</i> 2 = 46 | —         | 0.807    | —        | —         |

a. R Squared = 1.000 (Adjusted R Squared = 0.999)

**Table S10. One-way ANOVA** for the effect of different concentrations of flower extract on the mean inhibition zone diameter of *E. coli*.

| Source                 | <i>SS</i> | <i>df</i>       | <i>MS</i>        | <i>F</i> | <i>P</i> | $\eta^2$ | <i>OP</i> |
|------------------------|-----------|-----------------|------------------|----------|----------|----------|-----------|
| Between Groups         | 285.002   | 4               | 71.250           | 855.142  | <0.001   | 0.997    | 1.000     |
| Within Groups          | 0.833     | 10              | 0.083            | —        | —        | —        | —         |
| Total                  | 285.835   | 14              | —                | —        | —        | —        | —         |
| Levene's Test (Median) | —         | <i>df</i> 1 = 4 | <i>df</i> 2 = 10 | —        | 0.563    | —        | —         |

**Table S11. Tukey's HSD** pairwise comparisons of flower extract concentrations on the inhibition zone diameter of *E. coli*.

| Comparison       |                  | Mean Difference | Std. Error | <i>P</i> | 95% Confidence Interval |             |
|------------------|------------------|-----------------|------------|----------|-------------------------|-------------|
| Conc. I ( mg/ml) | Conc. J ( mg/ml) |                 |            |          | Lower Bound             | Upper Bound |
| 20               | 10               | 1.89667*        | 0.23568    | <0.001   | 1.1210                  | 2.6723      |
|                  | 5                | 6.12333*        | 0.23568    | <0.001   | 5.3477                  | 6.8990      |
|                  | 2.5              | 7.97000*        | 0.23568    | <0.001   | 7.1943                  | 8.7457      |
|                  | 1.25             | 12.23667*       | 0.23568    | <0.001   | 11.4610                 | 13.0123     |
| 10               | 5                | 4.22667*        | 0.23568    | <0.001   | 3.4510                  | 5.0023      |
|                  | 2.5              | 6.07333*        | 0.23568    | <0.001   | 5.2977                  | 6.8490      |
|                  | 1.25             | 10.34000*       | 0.23568    | <0.001   | 9.5643                  | 11.1157     |
| 5                | 2.5              | 1.84667*        | 0.23568    | <0.001   | 1.0710                  | 2.6223      |
|                  | 1.25             | 6.11333*        | 0.23568    | <0.001   | 5.3377                  | 6.8890      |
| 2.5              | 1.25             | 4.26667*        | 0.23568    | <0.001   | 3.4910                  | 5.0423      |

**Table S12.** Tukey's HSD homogeneous subsets for the flower extract concentrations on the inhibition zone diameter of *E. coli*

| Conc. (mg/mL) | N | Subset for $\alpha = 0.05$ |       |       |       |       |
|---------------|---|----------------------------|-------|-------|-------|-------|
|               |   | 1                          | 2     | 3     | 4     | 5     |
| 1.25          | 3 | 9.01                       | —     | —     | —     | —     |
| 2.5           | 3 | —                          | 13.28 | —     | —     | —     |
| 5             | 3 | —                          | —     | 15.12 | —     | —     |
| 10            | 3 | —                          | —     | —     | 19.35 | —     |
| 20            | 3 | —                          | —     | —     | —     | 21.25 |
| <i>P</i>      |   | 1.00                       | 1.00  | 1.00  | 1.00  | 1.00  |

**Table S13.** One-way ANOVA for the effect of different concentrations of leave extract on the mean inhibition zone diameter of *E. coli*.

| Source                 | <i>SS</i> | <i>df</i>       | <i>MS</i>       | <i>F</i> | <i>P</i> | $\eta^2$ | <i>OP</i> |
|------------------------|-----------|-----------------|-----------------|----------|----------|----------|-----------|
| Between Groups         | 546.025   | 4               | 136.506         | 3763.269 | <0.001   | 0.9993   | 1.000     |
| Within Groups          | 0.363     | 10              | 0.036           | —        | —        | —        | —         |
| Total                  | 285.835   | 14              | —               | —        | —        | —        | —         |
| Levene's Test (Median) | —         | <i>df</i> 1 = 4 | <i>df</i> 2 = 5 | —        | 0.274    | —        | —         |

**Table S14.** Tukey's HSD pairwise comparisons of leave extract concentrations on the inhibition zone diameter of *E. coli*.

| Comparison       |                  | Mean Difference | Std. Error | <i>P</i> | 95% Confidence Interval |             |
|------------------|------------------|-----------------|------------|----------|-------------------------|-------------|
| Conc. I ( mg/ml) | Conc. J ( mg/ml) |                 |            |          | Lower Bound             | Upper Bound |
| 20               | 10               | 2.14333*        | 0.15551    | <0.001   | 1.6315                  | 2.6551      |
|                  | 5                | 4.72333*        | 0.15551    | <0.001   | 4.2115                  | 5.2351      |
|                  | 2.5              | 14.22000*       | 0.15551    | <0.001   | 13.7082                 | 14.7318     |
|                  | 1.25             | 14.22000*       | 0.15551    | <0.001   | 13.7082                 | 14.7318     |
| 10               | 5                | 2.58000*        | 0.15551    | <0.001   | 2.0682                  | 3.0918      |
|                  | 2.5              | 12.07667*       | 0.15551    | <0.001   | 11.5649                 | 12.5885     |
|                  | 1.25             | 12.07667*       | 0.15551    | <0.001   | 11.5649                 | 12.5885     |
| 5                | 2.5              | 9.49667*        | 0.15551    | <0.001   | 8.9849                  | 10.0085     |
|                  | 1.25             | 9.49667*        | 0.15551    | <0.001   | 8.9849                  | 10.0085     |
| 2.5              | 1.25             | 0.00000         | 0.15551    | 1.000    | -0.5118                 | 0.5118      |

**Table S15.** Tukey's HSD homogeneous subsets for the leave extract concentrations on the inhibition zone diameter of *E. coli*

| Conc. (mg/mL) | N | Subset for $\alpha = 0.05$ |      |       |       |
|---------------|---|----------------------------|------|-------|-------|
|               |   | 1                          | 2    | 3     | 4     |
| 1.25          | 3 | 0.00                       | —    | —     | —     |
| 2.5           | 3 | 0.00                       | —    | —     | —     |
| 5             | 3 | —                          | 9.50 | —     | —     |
| 10            | 3 | —                          | —    | 12.08 | —     |
| 20            | 3 | —                          | —    | —     | 14.22 |
| <i>P</i>      | — | 1.00                       | 1.00 | 1.00  | 1.00  |

**Table S16.** One-way ANOVA for the effect of different concentrations of flower extract on the mean inhibition zone diameter of *S. aureus*.

| Source                 | SS       | df      | MS      | F        | P      | $\eta^2$ | OP    |
|------------------------|----------|---------|---------|----------|--------|----------|-------|
| Between Groups         | 2498.574 | 7       | 356.939 | 3870.832 | <0.001 | 0.9994   | 1.000 |
| Within Groups          | 1.475    | 16      | 0.092   | —        | —      | —        | —     |
| Total                  | 2500.049 | 23      | —       | —        | —      | —        | —     |
| Levene's Test (Median) | —        | df1 = 7 | df2 = 7 | —        | 0.688  | —        | —     |

**Table S17.** Tukey's HSD pairwise comparisons of flower extract concentrations on the inhibition zone diameter of *S. aureus*.

| Comparison       |                  | Mean Difference | Std. Error | P     | 95% Confidence Interval |             |
|------------------|------------------|-----------------|------------|-------|-------------------------|-------------|
| Conc. I ( mg/ml) | Conc. J ( mg/ml) |                 |            |       | Lower Bound             | Upper Bound |
| 20               | 10               | .00000          | .24794     | 1.000 | -.8584-                 | .8584       |
|                  | 5                | 4.24000*        | .24794     | .000  | 3.3816                  | 5.0984      |
|                  | 2.5              | 6.79000*        | .24794     | .000  | 5.9316                  | 7.6484      |
|                  | 1.25             | 13.77667*       | .24794     | .000  | 12.9183                 | 14.6351     |
|                  | 0.625            | 17.86000*       | .24794     | .000  | 17.0016                 | 18.7184     |
|                  | 0.312            | 24.83667*       | .24794     | .000  | 23.9783                 | 25.6951     |
|                  | 0.156            | 27.97667*       | .24794     | .000  | 27.1183                 | 28.8351     |
| 10               | 5                | 4.24000*        | .24794     | .000  | 3.3816                  | 5.0984      |
|                  | 2.5              | 6.79000*        | .24794     | .000  | 5.9316                  | 7.6484      |
|                  | 1.25             | 13.77667*       | .24794     | .000  | 12.9183                 | 14.6351     |
|                  | 0.625            | 17.86000*       | .24794     | .000  | 17.0016                 | 18.7184     |
|                  | 0.312            | 24.83667*       | .24794     | .000  | 23.9783                 | 25.6951     |
| 5                | 2.5              | 2.55000*        | .24794     | .000  | 1.6916                  | 3.4084      |
|                  | 1.25             | 9.53667*        | .24794     | .000  | 8.6783                  | 10.3951     |
|                  | 0.625            | 13.62000*       | .24794     | .000  | 12.7616                 | 14.4784     |
|                  | 0.312            | 20.59667*       | .24794     | .000  | 19.7383                 | 21.4551     |
|                  | 0.156            | 23.73667*       | .24794     | .000  | 22.8783                 | 24.5951     |
| 2.5              | 1.25             | 6.98667*        | .24794     | .000  | 6.1283                  | 7.8451      |
|                  | 0.625            | 11.07000*       | .24794     | .000  | 10.2116                 | 11.9284     |
|                  | 0.312            | 18.04667*       | .24794     | .000  | 17.1883                 | 18.9051     |
|                  | 0.156            | 21.18667*       | .24794     | .000  | 20.3283                 | 22.0451     |
| 1.25             | 0.625            | 4.08333*        | .24794     | .000  | 3.2249                  | 4.9417      |
|                  | 0.312            | 11.06000*       | .24794     | .000  | 10.2016                 | 11.9184     |
|                  | 0.156            | 14.20000*       | .24794     | .000  | 13.3416                 | 15.0584     |
| 0.625            | 0.312            | 6.97667*        | .24794     | .000  | 6.1183                  | 7.8351      |
|                  | 0.156            | 10.11667*       | .24794     | .000  | 9.2583                  | 10.9751     |
| 0.312            | 0.156            | 3.14000*        | .24794     | .000  | 2.2816                  | 3.9984      |

**Table S18.** Tukey's HSD homogeneous subsets for the flower extract concentrations on the inhibition zone diameter of *S. aureus*.

| Conc. (mg/mL) | N | Subset for $\alpha = 0.05$ |       |       |       |       |       |       |
|---------------|---|----------------------------|-------|-------|-------|-------|-------|-------|
|               |   | 1                          | 2     | 3     | 4     | 5     | 6     | 7     |
| 0.156         | 3 | 12.02                      | —     | —     | —     | —     | —     | —     |
| 0.312         | 3 | —                          | 15.16 | —     | —     | —     | —     | —     |
| 0.625         | 3 | —                          | —     | 22.14 | —     | —     | —     | —     |
| 1.25          | 3 | —                          | —     | —     | 26.22 | —     | —     | —     |
| 2.5           | 3 | —                          | —     | —     | —     | 33.21 | —     | —     |
| 5             | 3 | —                          | —     | —     | —     | —     | 35.76 | —     |
| 10            | 3 | —                          | —     | —     | —     | —     | —     | 40.00 |
| 20            | 3 | —                          | —     | —     | —     | —     | —     | 40.00 |
| P             | — | 1.00                       | 1.00  | 1.00  | 1.00  | 1.00  | 1.00  | 1.00  |

**Table S19.** One-way ANOVA for the effect of different concentrations of leave extract on the mean inhibition zone diameter of *S. aureus*.

| Source                 | SS      | df      | MS      | F       | P      | $\eta^2$ | OP    |
|------------------------|---------|---------|---------|---------|--------|----------|-------|
| Between Groups         | 262.498 | 4       | 65.624  | 604.871 | <0.001 | 0.997    | 1.000 |
| Within Groups          | 1.085   | 10      | 0.108   | —       | —      | —        | —     |
| Total                  | 263.583 | 14      | —       | —       | —      | —        | —     |
| Levene's Test (Median) | —       | df1 = 4 | df2 = 8 | —       | 0.874  | —        | —     |

**Table S20.** Tukey's HSD pairwise comparisons of leave extract concentrations on the inhibition zone diameter of *S. aureus*.

| Comparison       |                  | Mean Difference | Std. Error | P    | 95% Confidence Interval |             |
|------------------|------------------|-----------------|------------|------|-------------------------|-------------|
| Conc. I ( mg/ml) | Conc. J ( mg/ml) |                 |            |      | Lower Bound             | Upper Bound |
| 20               | 10               | 2.32000*        | .26894     | .000 | 1.4349                  | 3.2051      |
|                  | 5                | 6.73333*        | .26894     | .000 | 5.8482                  | 7.6184      |
|                  | 2.5              | 9.16000*        | .26894     | .000 | 8.2749                  | 10.0451     |
|                  | 1.25             | 11.24333*       | .26894     | .000 | 10.3582                 | 12.1284     |
| 10               | 5                | 4.41333*        | .26894     | .000 | 3.5282                  | 5.2984      |
|                  | 2.5              | 6.84000*        | .26894     | .000 | 5.9549                  | 7.7251      |
|                  | 1.25             | 8.92333*        | .26894     | .000 | 8.0382                  | 9.8084      |
| 5                | 2.5              | 2.42667*        | .26894     | .000 | 1.5416                  | 3.3118      |
|                  | 1.25             | 4.51000*        | .26894     | .000 | 3.6249                  | 5.3951      |
| 2.5              | 1.25             | 2.08333*        | .26894     | .000 | 1.1982                  | 2.9684      |

**Table S21.** Tukey's HSD homogeneous subsets for the leave extract concentrations on the inhibition zone diameter of *S. aureus*.

| Conc. (mg/mL) | N | Subset for $\alpha = 0.05$ |       |       |       |       |
|---------------|---|----------------------------|-------|-------|-------|-------|
|               |   | 1                          | 2     | 3     | 4     | 5     |
| 1.25          | 3 | 18.54                      | —     | —     | —     | —     |
| 2.5           | 3 | —                          | 20.62 | —     | —     | —     |
| 5             | 3 | —                          | —     | 23.05 | —     | —     |
| 10            | 3 | —                          | —     | —     | 27.46 | —     |
| 20            | 3 | —                          | —     | —     | —     | 29.78 |
| P             |   | 1.00                       | 1.00  | 1.00  | 1.00  | 1.00  |

**Table S22.** Independent samples t-Test comparing flower and leave extracts at different concentrations on the inhibition zone diameter of *E. coli*.

| Conc. (mg/mL) | Mean $\pm$ SD    |                  | t      | df | P      | MD    | 95% CI |       | Levene |      | Cohen's | Hedges' | Glass'   |
|---------------|------------------|------------------|--------|----|--------|-------|--------|-------|--------|------|---------|---------|----------|
|               | Flower           | Leave            |        |    |        |       | Lower  | Upper | F      | P    | D       | G       | $\Delta$ |
|               |                  |                  |        |    |        |       | r      |       |        |      |         |         |          |
| 20            | 21.25 $\pm$ 0.14 | 14.22 $\pm$ 0.30 | 36.88  | 4  | <0.001 | 7.03  | 6.50   | 7.56  | 2.09   | 0.22 | 30.11   | 24.02   | 23.33    |
| 10            | 19.35 $\pm$ 0.49 | 12.08 $\pm$ 0.12 | 24.89  | 4  | <0.001 | 7.27  | 6.46   | 8.08  | 5.46   | 0.08 | 20.32   | 16.22   | 62.29    |
| 5             | 15.12 $\pm$ 0.18 | 9.50 $\pm$ 0.28  | 29.70  | 4  | <0.001 | 5.63  | 5.10   | 6.15  | 0.68   | 0.46 | 24.25   | 19.35   | 20.27    |
| 2.5           | 13.28 $\pm$ 0.33 | 0.00 $\pm$ 0.00  | 70.75  | 4  | <0.001 | 13.28 | 12.76  | 13.80 | 4.13   | 0.11 | 57.77   | 46.09   | —        |
| 1.25          | 9.01 $\pm$ 0.14  | 0.00 $\pm$ 0.00  | 111.47 | 4  | <0.001 | 9.01  | 8.79   | 9.23  | 13.47  | 0.02 | 91.02   | 72.62   | —        |

Data are expressed as mean  $\pm$  standard deviation (SD). CI: confidence interval; MD: mean difference; F and P values correspond to Levene's test for equality of variances. Effect sizes were calculated using Cohen's d, Hedges' g, and Glass's  $\Delta$ . A dash (—) indicates that effect size could not be computed due to zero variance in the leave extract group. All effects were evaluated at  $\alpha = 0.05$ . Abbreviations and statistical conventions are identical across all subsequent t-test tables.

**Table S23.** Independent samples t-Test comparing flower and leaf extracts at different concentrations on the inhibition zone diameter of *S. aureus*.

| Conc.<br>(mg/mL) | Mean $\pm$ SD    |                  | <i>t</i> | <i>df</i> | <i>P</i> | <i>MD</i> | 95% <i>CI</i> |       | Levene   |          | Cohen's<br><i>D</i> | Hedges'<br><i>G</i> | Glass'<br><i>s</i><br>$\Delta$ |
|------------------|------------------|------------------|----------|-----------|----------|-----------|---------------|-------|----------|----------|---------------------|---------------------|--------------------------------|
|                  | Flower           | leaf             |          |           |          |           | Lower         | Upper | <i>F</i> | <i>P</i> |                     |                     |                                |
| 20               | 40.00 $\pm$ 0.00 | 29.78 $\pm$ 0.33 | 53.57    | 4         | <0.001   | 10.22     | 9.69          | 10.75 | 4.797    | 0.094    | 43.74               | 34.90               | 30.93                          |
| 10               | 40.00 $\pm$ 0.00 | 27.46 $\pm$ 0.27 | 81.92    | 4         | <0.001   | 12.54     | 12.11         | 12.96 | 7.878    | 0.048    | 66.89               | 53.37               | 47.30                          |
| 5                | 35.76 $\pm$ 0.49 | 23.05 $\pm$ 0.20 | 41.58    | 4         | <0.001   | 12.71     | 11.86         | 13.56 | 3.965    | 0.117    | 33.95               | 27.09               | 62.31                          |
| 2.5              | 33.21 $\pm$ 0.47 | 20.62 $\pm$ 0.48 | 32.36    | 4         | <0.001   | 12.59     | 11.51         | 13.67 | 0.007    | 0.939    | 26.43               | 21.08               | 26.15                          |
| 1.25             | 26.22 $\pm$ 0.33 | 18.54 $\pm$ 0.29 | 29.75    | 4         | <0.001   | 7.69      | 6.97          | 8.40  | 0.055    | 0.827    | 24.29               | 19.38               | 25.68                          |

**Table S24.** One-way ANOVA for evaluating the effects of flower extract concentrations and antibiotics on the inhibition zone diameter of *E. coli*.

| Source                 | <i>SS</i> | <i>df</i>        | <i>MS</i>        | <i>F</i> | <i>P</i> | $\eta^2$ | <i>OP</i> |
|------------------------|-----------|------------------|------------------|----------|----------|----------|-----------|
| Between Groups         | 5172.699  | 20               | 258.635          | 1339.284 | <0.001   | 0.998    | 1.000     |
| Within Groups          | 8.111     | 42               | 0.193            | —        | —        | —        | —         |
| Total                  | 5180.810  | 62               | —                | —        | —        | —        | —         |
| Levene's Test (Median) | —         | <i>df</i> 1 = 20 | <i>df</i> 2 = 12 | —        | 0.097    | —        | —         |

**Table S25.** Tukey's HSD pairwise comparisons of flower extract concentrations and antibiotics on the inhibition zone diameter of *E. coli*.

| Conc. I (mg/ml) | Comparison<br>Anti. J | Mean Difference | Std. Error | <i>P</i> | 95% Confidence Interval |             |
|-----------------|-----------------------|-----------------|------------|----------|-------------------------|-------------|
|                 |                       |                 |            |          | Lower Bound             | Upper Bound |
| 20              | CPM30                 | 21.24667*       | .35881     | <0.001   | 19.8811                 | 22.6123     |
|                 | VA30                  | 21.24667*       | .35881     | <0.001   | 19.8811                 | 22.6123     |
|                 | AMC20                 | 21.24667*       | .35881     | <0.001   | 19.8811                 | 22.6123     |
|                 | COT25                 | -3.12000*       | .35881     | <0.001   | -4.4856-                | -1.7544-    |
|                 | GEN10                 | 3.82000*        | .35881     | <0.001   | 2.4544                  | 5.1856      |
|                 | CN30                  | 21.24667*       | .35881     | <0.001   | 19.8811                 | 22.6123     |
|                 | LE5                   | 7.58000*        | .35881     | <0.001   | 6.2144                  | 8.9456      |
|                 | IPM10                 | -6.72000*       | .35881     | <0.001   | -8.0856-                | -5.3544-    |
|                 | AMP10                 | 21.24667*       | .35881     | <0.001   | 19.8811                 | 22.6123     |
|                 | TOB10                 | 10.78000*       | .35881     | <0.001   | 9.4144                  | 12.1456     |
|                 | CD2                   | 21.24667*       | .35881     | <0.001   | 19.8811                 | 22.6123     |
|                 | DOX30                 | 9.78000*        | .35881     | <0.001   | 8.4144                  | 11.1456     |
|                 | AK30                  | 5.64667*        | .35881     | <0.001   | 4.2811                  | 7.0123      |
|                 | CIP5                  | 21.24667*       | .35881     | <0.001   | 19.8811                 | 22.6123     |
|                 | AZM15                 | 4.74667*        | .35881     | <0.001   | 3.3811                  | 6.1123      |
| 10              | TE30                  | 21.24667*       | .35881     | <0.001   | 19.8811                 | 22.6123     |
|                 | CPM30                 | 19.35000*       | .35881     | <0.001   | 17.9844                 | 20.7156     |
|                 | VA30                  | 19.35000*       | .35881     | <0.001   | 17.9844                 | 20.7156     |
|                 | AMC20                 | 19.35000*       | .35881     | <0.001   | 17.9844                 | 20.7156     |
|                 | COT25                 | -5.01667*       | .35881     | <0.001   | -6.3823-                | -3.6511-    |
|                 | GEN10                 | 1.92333*        | .35881     | .001     | .5577                   | 3.2889      |
|                 | CN30                  | 19.35000*       | .35881     | <0.001   | 17.9844                 | 20.7156     |
|                 | LE5                   | 5.68333*        | .35881     | <0.001   | 4.3177                  | 7.0489      |
|                 | IPM10                 | -8.61667*       | .35881     | <0.001   | -9.9823-                | -7.2511-    |
|                 | AMP10                 | 19.35000*       | .35881     | <0.001   | 17.9844                 | 20.7156     |
|                 | TOB10                 | 8.88333*        | .35881     | <0.001   | 7.5177                  | 10.2489     |
|                 | CD2                   | 19.35000*       | .35881     | <0.001   | 17.9844                 | 20.7156     |
|                 | DOX30                 | 7.88333*        | .35881     | <0.001   | 6.5177                  | 9.2489      |
|                 | AK30                  | 3.75000*        | .35881     | <0.001   | 2.3844                  | 5.1156      |
|                 | CIP5                  | 19.35000*       | .35881     | <0.001   | 17.9844                 | 20.7156     |
| AZM15           | 2.85000*              | .35881          | <0.001     | 1.4844   | 4.2156                  |             |
| 5               | TE30                  | 19.35000*       | .35881     | <0.001   | 17.9844                 | 20.7156     |
|                 | CPM30                 | 15.12333*       | .35881     | <0.001   | 13.7577                 | 16.4889     |
|                 | VA30                  | 15.12333*       | .35881     | <0.001   | 13.7577                 | 16.4889     |
|                 | AMC20                 | 15.12333*       | .35881     | <0.001   | 13.7577                 | 16.4889     |

|       |       |                         |                      |        |           |           |         |
|-------|-------|-------------------------|----------------------|--------|-----------|-----------|---------|
|       | COT25 | -9.24333 <sup>-*</sup>  | .35881               | <0.001 | -10.6089- | -7.8777-  |         |
|       | GEN10 | -2.30333 <sup>-*</sup>  | .35881               | <0.001 | -3.6689-  | -.9377-   |         |
|       | CN30  | 15.12333 <sup>*</sup>   | .35881               | <0.001 | 13.7577   | 16.4889   |         |
|       | LE5   | 1.45667 <sup>*</sup>    | .35881               | <0.001 | .0911     | 2.8223    |         |
|       | IPM10 | -12.84333 <sup>-*</sup> | .35881               | <0.001 | -14.2089- | -11.4777- |         |
|       | AMP10 | 15.12333 <sup>*</sup>   | .35881               | <0.001 | 13.7577   | 16.4889   |         |
|       | TOB10 | 4.65667 <sup>*</sup>    | .35881               | <0.001 | 3.2911    | 6.0223    |         |
|       | CD2   | 15.12333 <sup>*</sup>   | .35881               | <0.001 | 13.7577   | 16.4889   |         |
|       | DOX30 | 3.65667 <sup>*</sup>    | .35881               | <0.001 | 2.2911    | 5.0223    |         |
|       | AK30  | -.47667-                | .35881               | .998   | -1.8423-  | .8889     |         |
|       | CIP5  | 15.12333 <sup>*</sup>   | .35881               | <0.001 | 13.7577   | 16.4889   |         |
|       | AZM15 | -1.37667 <sup>-*</sup>  | .35881               | .046   | -2.7423-  | -.0111-   |         |
|       | TE30  | 15.12333 <sup>*</sup>   | .35881               | <0.001 | 13.7577   | 16.4889   |         |
| 2.5   | CPM30 | 13.27667 <sup>*</sup>   | .35881               | <0.001 | 11.9111   | 14.6423   |         |
|       | VA30  | 13.27667 <sup>*</sup>   | .35881               | <0.001 | 11.9111   | 14.6423   |         |
|       | AMC20 | 13.27667 <sup>*</sup>   | .35881               | <0.001 | 11.9111   | 14.6423   |         |
|       | COT25 | -11.09000 <sup>-*</sup> | .35881               | <0.001 | -12.4556- | -9.7244-  |         |
|       | GEN10 | -4.15000 <sup>-*</sup>  | .35881               | <0.001 | -5.5156-  | -2.7844-  |         |
|       | CN30  | 13.27667 <sup>*</sup>   | .35881               | <0.001 | 11.9111   | 14.6423   |         |
|       | LE5   | -.39000-                | .35881               | 1.000  | -1.7556-  | .9756     |         |
|       | IPM10 | -14.69000 <sup>-*</sup> | .35881               | <0.001 | -16.0556- | -13.3244- |         |
|       | AMP10 | 13.27667 <sup>*</sup>   | .35881               | <0.001 | 11.9111   | 14.6423   |         |
|       | TOB10 | 2.81000 <sup>*</sup>    | .35881               | <0.001 | 1.4444    | 4.1756    |         |
|       | CD2   | 13.27667 <sup>*</sup>   | .35881               | <0.001 | 11.9111   | 14.6423   |         |
|       | DOX30 | 1.81000 <sup>*</sup>    | .35881               | .001   | .4444     | 3.1756    |         |
|       | AK30  | -2.32333 <sup>-*</sup>  | .35881               | <0.001 | -3.6889-  | -.9577-   |         |
|       | CIP5  | 13.27667 <sup>*</sup>   | .35881               | <0.001 | 11.9111   | 14.6423   |         |
|       | AZM15 | -3.22333 <sup>-*</sup>  | .35881               | <0.001 | -4.5889-  | -1.8577-  |         |
|       | TE30  | 13.27667 <sup>*</sup>   | .35881               | <0.001 | 11.9111   | 14.6423   |         |
|       | 1.25  | CPM30                   | 9.01000 <sup>*</sup> | .35881 | <0.001    | 7.6444    | 10.3756 |
|       |       | VA30                    | 9.01000 <sup>*</sup> | .35881 | <0.001    | 7.6444    | 10.3756 |
| AMC20 |       | 9.01000 <sup>*</sup>    | .35881               | <0.001 | 7.6444    | 10.3756   |         |
| COT25 |       | -15.35667 <sup>-*</sup> | .35881               | <0.001 | -16.7223- | -13.9911- |         |
| GEN10 |       | -8.41667 <sup>-*</sup>  | .35881               | <0.001 | -9.7823-  | -7.0511-  |         |
| CN30  |       | 9.01000 <sup>*</sup>    | .35881               | <0.001 | 7.6444    | 10.3756   |         |
| LE5   |       | -4.65667 <sup>-*</sup>  | .35881               | <0.001 | -6.0223-  | -3.2911-  |         |
| IPM10 |       | -18.95667 <sup>-*</sup> | .35881               | <0.001 | -20.3223- | -17.5911- |         |
| AMP10 |       | 9.01000 <sup>*</sup>    | .35881               | <0.001 | 7.6444    | 10.3756   |         |
| TOB10 |       | -1.45667 <sup>-*</sup>  | .35881               | .026   | -2.8223-  | -.0911-   |         |
| CD2   |       | 9.01000 <sup>*</sup>    | .35881               | <0.001 | 7.6444    | 10.3756   |         |
| DOX30 |       | -2.45667 <sup>-*</sup>  | .35881               | <0.001 | -3.8223-  | -1.0911-  |         |
| AK30  |       | -6.59000 <sup>-*</sup>  | .35881               | <0.001 | -7.9556-  | -5.2244-  |         |
| CIP5  |       | 9.01000 <sup>*</sup>    | .35881               | <0.001 | 7.6444    | 10.3756   |         |
| AZM15 |       | -7.49000 <sup>-*</sup>  | .35881               | <0.001 | -8.8556-  | -6.1244-  |         |
| TE30  |       | 9.01000 <sup>*</sup>    | .35881               | <0.001 | 7.6444    | 10.3756   |         |

Table S26. Tukey's HSD homogeneous subsets for the flower extract concentrations and antibiotics on the inhibition zone diameter of *E. coli*.

| Group / Treatment | N | Subset for $\alpha = 0.05$ |      |       |       |   |   |   |   |   |    |    |
|-------------------|---|----------------------------|------|-------|-------|---|---|---|---|---|----|----|
|                   |   | 1                          | 2    | 3     | 4     | 5 | 6 | 7 | 8 | 9 | 10 | 11 |
| CPM30             | 3 | 0.00                       | —    | —     | —     | — | — | — | — | — | —  | —  |
| VA30              | 3 | 0.00                       | —    | —     | —     | — | — | — | — | — | —  | —  |
| AMC20             | 3 | 0.00                       | —    | —     | —     | — | — | — | — | — | —  | —  |
| CN30              | 3 | 0.00                       | —    | —     | —     | — | — | — | — | — | —  | —  |
| AMP10             | 3 | 0.00                       | —    | —     | —     | — | — | — | — | — | —  | —  |
| CD2               | 3 | 0.00                       | —    | —     | —     | — | — | — | — | — | —  | —  |
| CIP5              | 3 | 0.00                       | —    | —     | —     | — | — | — | — | — | —  | —  |
| TE30              | 3 | 0.00                       | —    | —     | —     | — | — | — | — | — | —  | —  |
| 1.25 mg/ml        | 3 | —                          | 9.01 | —     | —     | — | — | — | — | — | —  | —  |
| TOB10             | 3 | —                          | —    | 10.47 | —     | — | — | — | — | — | —  | —  |
| DOX30             | 3 | —                          | —    | 11.47 | —     | — | — | — | — | — | —  | —  |
| 2.5 mg/ml         | 3 | —                          | —    | —     | 13.28 | — | — | — | — | — | —  | —  |
| LE5               | 3 | —                          | —    | —     | 13.67 | — | — | — | — | — | —  | —  |

|          |   |       |       |      |       |       |       |       |       |       |       |       |
|----------|---|-------|-------|------|-------|-------|-------|-------|-------|-------|-------|-------|
| 5 mg/ml  | 3 | —     | —     | —    | —     | 15.12 | —     | —     | —     | —     | —     | —     |
| AK30     | 3 | —     | —     | —    | —     | 15.60 | 15.60 | —     | —     | —     | —     | —     |
| AZM15    | 3 | —     | —     | —    | —     | —     | 16.50 | 16.50 | —     | —     | —     | —     |
| GEN10    | 3 | —     | —     | —    | —     | —     | —     | 17.43 | —     | —     | —     | —     |
| 10 mg/ml | 3 | —     | —     | —    | —     | —     | —     | —     | 19.35 | —     | —     | —     |
| 20 mg/ml | 3 | —     | —     | —    | —     | —     | —     | —     | —     | 21.25 | —     | —     |
| COT25    | 3 | —     | —     | —    | —     | —     | —     | —     | —     | —     | 24.37 | —     |
| IPM10    | 3 | —     | —     | —    | —     | —     | —     | —     | —     | —     | —     | 27.97 |
| <i>P</i> |   | 1.000 | 1.000 | .418 | 1.000 | .998  | .606  | .555  | 1.000 | 1.000 | 1.000 | 1.000 |

Table S27. One-way ANOVA for evaluating the effects of flower extract concentrations and antibiotics on the inhibition zone diameter of *S. aureus*.

| Source                 | <i>SS</i> | <i>df</i>        | <i>MS</i>        | <i>F</i> | <i>P</i> | $\eta^2$ | <i>OP</i> |
|------------------------|-----------|------------------|------------------|----------|----------|----------|-----------|
| Between Groups         | 7196.487  | 23               | 312.891          | 308.085  | <0.001   | 0.994    | 1.000     |
| Within Groups          | 48.749    | 48               | 1.016            | —        | —        | —        | —         |
| Total                  | 7245.236  | 71               | —                | —        | —        | —        | —         |
| Levene's Test (Median) | —         | <i>df</i> 1 = 23 | <i>df</i> 2 = 18 | —        | 0.204    | —        | —         |

Table S28. Tukey's HSD pairwise comparisons of flower extract concentrations and antibiotics on the inhibition zone diameter of *S. aureus*.

| Conc. I (mg/ml) | Comparison<br>Anti. J | Mean Difference | Std. Error | <i>P</i> | 95% Confidence Interval |             |
|-----------------|-----------------------|-----------------|------------|----------|-------------------------|-------------|
|                 |                       |                 |            |          | Lower Bound             | Upper Bound |
| 20              | CPM30                 | 40.00000*       | .82284     | .000     | 36.8284                 | 43.1716     |
|                 | VA30                  | 21.23333*       | .82284     | .000     | 18.0617                 | 24.4049     |
|                 | AMC20                 | 28.76667*       | .82284     | .000     | 25.5951                 | 31.9383     |
|                 | COT25                 | 25.73333*       | .82284     | .000     | 22.5617                 | 28.9049     |
|                 | GEN10                 | 18.46667*       | .82284     | .000     | 15.2951                 | 21.6383     |
|                 | CN30                  | 21.50000*       | .82284     | .000     | 18.3284                 | 24.6716     |
|                 | LE5                   | 13.86667*       | .82284     | .000     | 10.6951                 | 17.0383     |
|                 | IPM10                 | 14.86667*       | .82284     | .000     | 11.6951                 | 18.0383     |
|                 | AMP10                 | 40.00000*       | .82284     | .000     | 36.8284                 | 43.1716     |
|                 | TOB10                 | 22.30000*       | .82284     | .000     | 19.1284                 | 25.4716     |
|                 | CD2                   | 17.63333*       | .82284     | .000     | 14.4617                 | 20.8049     |
|                 | DOX30                 | 19.76667*       | .82284     | .000     | 16.5951                 | 22.9383     |
|                 | AK30                  | 22.93333*       | .82284     | .000     | 19.7617                 | 26.1049     |
|                 | CIP5                  | 17.50000*       | .82284     | .000     | 14.3284                 | 20.6716     |
| AZM15           | 13.93333*             | .82284          | .000       | 10.7617  | 17.1049                 |             |
| 10              | TE30                  | 13.03333*       | .82284     | .000     | 9.8617                  | 16.2049     |
|                 | CPM30                 | 40.00000*       | .82284     | .000     | 36.8284                 | 43.1716     |
|                 | VA30                  | 21.23333*       | .82284     | .000     | 18.0617                 | 24.4049     |
|                 | AMC20                 | 28.76667*       | .82284     | .000     | 25.5951                 | 31.9383     |
|                 | COT25                 | 25.73333*       | .82284     | .000     | 22.5617                 | 28.9049     |
|                 | GEN10                 | 18.46667*       | .82284     | .000     | 15.2951                 | 21.6383     |
|                 | CN30                  | 21.50000*       | .82284     | .000     | 18.3284                 | 24.6716     |
|                 | LE5                   | 13.86667*       | .82284     | .000     | 10.6951                 | 17.0383     |
|                 | IPM10                 | 14.86667*       | .82284     | .000     | 11.6951                 | 18.0383     |
|                 | AMP10                 | 40.00000*       | .82284     | .000     | 36.8284                 | 43.1716     |
|                 | TOB10                 | 22.30000*       | .82284     | .000     | 19.1284                 | 25.4716     |
|                 | CD2                   | 17.63333*       | .82284     | .000     | 14.4617                 | 20.8049     |
|                 | DOX30                 | 19.76667*       | .82284     | .000     | 16.5951                 | 22.9383     |
|                 | AK30                  | 22.93333*       | .82284     | .000     | 19.7617                 | 26.1049     |
| CIP5            | 17.50000*             | .82284          | .000       | 14.3284  | 20.6716                 |             |
| 5               | AZM15                 | 13.93333*       | .82284     | .000     | 10.7617                 | 17.1049     |
|                 | TE30                  | 13.03333*       | .82284     | .000     | 9.8617                  | 16.2049     |
|                 | CPM30                 | 35.76000*       | .82284     | .000     | 32.5884                 | 38.9316     |
|                 | VA30                  | 16.99333*       | .82284     | .000     | 13.8217                 | 20.1649     |
|                 | AMC20                 | 24.52667*       | .82284     | .000     | 21.3551                 | 27.6983     |
|                 | COT25                 | 21.49333*       | .82284     | .000     | 18.3217                 | 24.6649     |
| GEN10           | 14.22667*             | .82284          | .000       | 11.0551  | 17.3983                 |             |
| CN30            | 17.26000*             | .82284          | .000       | 14.0884  | 20.4316                 |             |

|       |       |            |        |       |           |          |
|-------|-------|------------|--------|-------|-----------|----------|
|       | LE5   | 9.62667*   | .82284 | .000  | 6.4551    | 12.7983  |
|       | IPM10 | 10.62667*  | .82284 | .000  | 7.4551    | 13.7983  |
|       | AMP10 | 35.76000*  | .82284 | .000  | 32.5884   | 38.9316  |
|       | TOB10 | 18.06000*  | .82284 | .000  | 14.8884   | 21.2316  |
|       | CD2   | 13.39333*  | .82284 | .000  | 10.2217   | 16.5649  |
|       | DOX30 | 15.52667*  | .82284 | .000  | 12.3551   | 18.6983  |
|       | AK30  | 18.69333*  | .82284 | .000  | 15.5217   | 21.8649  |
|       | CIP5  | 13.26000*  | .82284 | .000  | 10.0884   | 16.4316  |
|       | AZM15 | 9.69333*   | .82284 | .000  | 6.5217    | 12.8649  |
|       | TE30  | 8.79333*   | .82284 | .000  | 5.6217    | 11.9649  |
|       | CPM30 | 33.21000*  | .82284 | .000  | 30.0384   | 36.3816  |
|       | VA30  | 14.44333*  | .82284 | .000  | 11.2717   | 17.6149  |
|       | AMC20 | 21.97667*  | .82284 | .000  | 18.8051   | 25.1483  |
|       | COT25 | 18.94333*  | .82284 | .000  | 15.7717   | 22.1149  |
|       | GEN10 | 11.67667*  | .82284 | .000  | 8.5051    | 14.8483  |
|       | CN30  | 14.71000*  | .82284 | .000  | 11.5384   | 17.8816  |
| 2.5   | LE5   | 7.07667*   | .82284 | .000  | 3.9051    | 10.2483  |
|       | IPM10 | 8.07667*   | .82284 | .000  | 4.9051    | 11.2483  |
|       | AMP10 | 33.21000*  | .82284 | .000  | 30.0384   | 36.3816  |
|       | TOB10 | 15.51000*  | .82284 | .000  | 12.3384   | 18.6816  |
|       | CD2   | 10.84333*  | .82284 | .000  | 7.6717    | 14.0149  |
|       | DOX30 | 12.97667*  | .82284 | .000  | 9.8051    | 16.1483  |
|       | AK30  | 16.14333*  | .82284 | .000  | 12.9717   | 19.3149  |
|       | CIP5  | 10.71000*  | .82284 | .000  | 7.5384    | 13.8816  |
|       | AZM15 | 7.14333*   | .82284 | .000  | 3.9717    | 10.3149  |
|       | TE30  | 6.24333*   | .82284 | .000  | 3.0717    | 9.4149   |
|       | CPM30 | 26.22333*  | .82284 | .000  | 23.0517   | 29.3949  |
|       | VA30  | 7.45667*   | .82284 | .000  | 4.2851    | 10.6283  |
|       | AMC20 | 14.99000*  | .82284 | .000  | 11.8184   | 18.1616  |
|       | COT25 | 11.95667*  | .82284 | .000  | 8.7851    | 15.1283  |
|       | GEN10 | 4.69000*   | .82284 | .000  | 1.5184    | 7.8616   |
|       | CN30  | 7.72333*   | .82284 | .000  | 4.5517    | 10.8949  |
| 1.25  | LE5   | .09000     | .82284 | 1.000 | -3.0816-  | 3.2616   |
|       | IPM10 | 1.09000    | .82284 | .999  | -2.0816-  | 4.2616   |
|       | AMP10 | 26.22333*  | .82284 | .000  | 23.0517   | 29.3949  |
|       | TOB10 | 8.52333*   | .82284 | .000  | 5.3517    | 11.6949  |
|       | CD2   | 3.85667*   | .82284 | .005  | .6851     | 7.0283   |
|       | DOX30 | 5.99000*   | .82284 | .000  | 2.8184    | 9.1616   |
|       | AK30  | 9.15667*   | .82284 | .000  | 5.9851    | 12.3283  |
|       | CIP5  | 3.72333*   | .82284 | .007  | .5517     | 6.8949   |
|       | AZM15 | .15667     | .82284 | 1.000 | -3.0149-  | 3.3283   |
|       | TE30  | -.74333-   | .82284 | 1.000 | -3.9149-  | 2.4283   |
|       | CPM30 | 22.14000*  | .82284 | .000  | 18.9684   | 25.3116  |
|       | VA30  | 3.37333*   | .82284 | .026  | .2017     | 6.5449   |
|       | AMC20 | 10.90667*  | .82284 | .000  | 7.7351    | 14.0783  |
|       | COT25 | 7.87333*   | .82284 | .000  | 4.7017    | 11.0449  |
|       | GEN10 | .60667     | .82284 | 1.000 | -2.5649-  | 3.7783   |
|       | CN30  | 3.64000*   | .82284 | .010  | .4684     | 6.8116   |
|       | LE5   | -3.99333-  | .82284 | .003  | -7.1649-  | -8.217-  |
| 0.625 | IPM10 | -2.99333-  | .82284 | .087  | -6.1649-  | .1783    |
|       | AMP10 | 22.14000*  | .82284 | .000  | 18.9684   | 25.3116  |
|       | TOB10 | 4.44000*   | .82284 | .000  | 1.2684    | 7.6116   |
|       | CD2   | -.22667-   | .82284 | 1.000 | -3.3983-  | 2.9449   |
|       | DOX30 | 1.90667    | .82284 | .788  | -1.2649-  | 5.0783   |
|       | AK30  | 5.07333*   | .82284 | .000  | 1.9017    | 8.2449   |
|       | CIP5  | -.36000-   | .82284 | 1.000 | -3.5316-  | 2.8116   |
|       | AZM15 | -3.92667*  | .82284 | .003  | -7.0983-  | -.7551-  |
|       | TE30  | -4.82667*  | .82284 | .000  | -7.9983-  | -1.6551- |
|       | CPM30 | 15.16333*  | .82284 | .000  | 11.9917   | 18.3349  |
|       | VA30  | -3.60333*  | .82284 | .011  | -6.7749-  | -.4317-  |
|       | AMC20 | 3.93000*   | .82284 | .003  | .7584     | 7.1016   |
|       | COT25 | .89667     | .82284 | 1.000 | -2.2749-  | 4.0683   |
| 0.312 | GEN10 | -6.37000*  | .82284 | .000  | -9.5416-  | -3.1984- |
|       | CN30  | -3.33667*  | .82284 | .029  | -6.5083-  | -.1651-  |
|       | LE5   | -10.97000* | .82284 | .000  | -14.1416- | -7.7984- |
|       | IPM10 | -9.97000*  | .82284 | .000  | -13.1416- | -6.7984- |

|       |       |             |        |       |           |           |
|-------|-------|-------------|--------|-------|-----------|-----------|
|       | AMP10 | 15.16333*   | .82284 | .000  | 11.9917   | 18.3349   |
|       | TOB10 | -2.53667-   | .82284 | .288  | -5.7083-  | .6349     |
|       | CD2   | -7.20333-*  | .82284 | .000  | -10.3749- | -4.0317-  |
|       | DOX30 | -5.07000-*  | .82284 | .000  | -8.2416-  | -1.8984-  |
|       | AK30  | -1.90333-   | .82284 | .790  | -5.0749-  | 1.2683    |
|       | CIP5  | -7.33667-*  | .82284 | .000  | -10.5083- | -4.1651-  |
|       | AZM15 | -10.90333-* | .82284 | .000  | -14.0749- | -7.7317-  |
|       | TE30  | -11.80333-* | .82284 | .000  | -14.9749- | -8.6317-  |
| 0.156 | CPM30 | 12.02333*   | .82284 | .000  | 8.8517    | 15.1949   |
|       | VA30  | -6.74333-*  | .82284 | .000  | -9.9149-  | -3.5717-  |
|       | AMC20 | .79000      | .82284 | 1.000 | -2.3816-  | 3.9616    |
|       | COT25 | -2.24333-   | .82284 | .512  | -5.4149-  | .9283     |
|       | GEN10 | -9.51000-*  | .82284 | .000  | -12.6816- | -6.3384-  |
|       | CN30  | -6.47667-*  | .82284 | .000  | -9.6483-  | -3.3051-  |
|       | LE5   | -14.11000-* | .82284 | .000  | -17.2816- | -10.9384- |
|       | IPM10 | -13.11000-* | .82284 | .000  | -16.2816- | -9.9384-  |
|       | AMP10 | 12.02333*   | .82284 | .000  | 8.8517    | 15.1949   |
|       | TOB10 | -5.67667-*  | .82284 | .000  | -8.8483-  | -2.5051-  |
|       | CD2   | -10.34333-* | .82284 | .000  | -13.5149- | -7.1717-  |
|       | DOX30 | -8.21000-*  | .82284 | .000  | -11.3816- | -5.0384-  |
|       | AK30  | -5.04333-*  | .82284 | .000  | -8.2149-  | -1.8717-  |
|       | CIP5  | -10.47667-* | .82284 | .000  | -13.6483- | -7.3051-  |
|       | AZM15 | -14.04333-* | .82284 | .000  | -17.2149- | -10.8717- |
|       | TE30  | -14.94333-* | .82284 | .000  | -18.1149- | -11.7717- |

Table S29. Tukey's HSD homogeneous subsets for the flower extract concentrations and antibiotics on the inhibition zone diameter of *S. aureus*.

| Group / Treatment | N | Subset for $\alpha = 0.05$ |       |       |       |       |       |       |       |       |       |       |       |
|-------------------|---|----------------------------|-------|-------|-------|-------|-------|-------|-------|-------|-------|-------|-------|
|                   |   | 1                          | 2     | 3     | 4     | 5     | 6     | 7     | 8     | 9     | 10    | 11    | 12    |
| CPM30             | 3 | 0.00                       | —     | —     | —     | —     | —     | —     | —     | —     | —     | —     | —     |
| AMP10             | 3 | 0.00                       | —     | —     | —     | —     | —     | —     | —     | —     | —     | —     | —     |
| AMC20             | 3 | —                          | 11.23 | —     | —     | —     | —     | —     | —     | —     | —     | —     | —     |
| 0.156 mg/ml       | 3 | —                          | 12.02 | 12.02 | —     | —     | —     | —     | —     | —     | —     | —     | —     |
| COT25             | 3 | —                          | 14.27 | 14.27 | 14.27 | —     | —     | —     | —     | —     | —     | —     | —     |
| 0.312 mg/ml       | 3 | —                          | —     | 15.16 | 15.16 | 15.16 | —     | —     | —     | —     | —     | —     | —     |
| AK30              | 3 | —                          | —     | —     | 17.07 | 17.07 | 17.07 | —     | —     | —     | —     | —     | —     |
| TOB10             | 3 | —                          | —     | —     | —     | 17.70 | 17.70 | —     | —     | —     | —     | —     | —     |
| CN30              | 3 | —                          | —     | —     | —     | —     | 18.50 | 18.50 | —     | —     | —     | —     | —     |
| VA30              | 3 | —                          | —     | —     | —     | —     | 18.77 | 18.77 | —     | —     | —     | —     | —     |
| DOX30             | 3 | —                          | —     | —     | —     | —     | 20.23 | 20.23 | 20.23 | —     | —     | —     | —     |
| GEN10             | 3 | —                          | —     | —     | —     | —     | —     | 21.53 | 21.53 | —     | —     | —     | —     |
| 0.625 mg/ml       | 3 | —                          | —     | —     | —     | —     | —     | —     | 22.14 | 22.14 | —     | —     | —     |
| CD2               | 3 | —                          | —     | —     | —     | —     | —     | —     | 22.37 | 22.37 | —     | —     | —     |
| CIP5              | 3 | —                          | —     | —     | —     | —     | —     | —     | 22.50 | 22.50 | —     | —     | —     |
| IPM10             | 3 | —                          | —     | —     | —     | —     | —     | —     | —     | 25.13 | 25.13 | —     | —     |
| AZM15             | 3 | —                          | —     | —     | —     | —     | —     | —     | —     | —     | 26.07 | —     | —     |
| LE5               | 3 | —                          | —     | —     | —     | —     | —     | —     | —     | —     | 26.13 | —     | —     |
| 1.25 mg/ml        | 3 | —                          | —     | —     | —     | —     | —     | —     | —     | —     | 26.22 | —     | —     |
| TE30              | 3 | —                          | —     | —     | —     | —     | —     | —     | —     | —     | 26.97 | —     | —     |
| 2.5 mg/ml         | 3 | —                          | —     | —     | —     | —     | —     | —     | —     | —     | —     | 33.21 | —     |
| 5 mg/ml           | 3 | —                          | —     | —     | —     | —     | —     | —     | —     | —     | —     | 35.76 | —     |
| 10 mg/ml          | 3 | —                          | —     | —     | —     | —     | —     | —     | —     | —     | —     | —     | 40.00 |
| 20 mg/ml          | 3 | —                          | —     | —     | —     | —     | —     | —     | —     | —     | —     | —     | 40.00 |
| P                 |   | 1.000                      | .077  | .055  | .150  | .288  | .051  | .077  | .492  | .087  | .837  | .280  | 1.000 |

## Notes and references

- 1 P. L. Santos, J. P. S. C. F. Matos, L. Picot, J. R. G. S. Almeida, J. S. S. Quintans and L. J. Quintans-Junior, *Food and Chemical Toxicology*, 2019, **123**, 459–469.

- 2 B. Floris, P. Galloni, V. Conte and F. Sabuzi, *Biomolecules*, 2021, **11**, 1325.
- 3 J. Boonen, A. Bronselaer, J. Nielandt, L. Veryser, G. De Tre and B. De Spiegeleer, *J. Ethnopharmacol.*, 2012, **142**, 563–590.
- 4 M. Tan, L. Zhou, Y. Huang, Y. Wang, X. Hao and J. Wang, *Nat. Prod. Res.*, 2008, **22**, 569–575.
- 5 D. Misra, N. N. Ghosh, M. Mandal, V. Mandal, N. Baildya, S. Mandal and V. Mandal, *Brazilian Journal of Microbiology*, 2022, **53**, 715–726.
- 6 E. J. Yang, Y.-S. Kim and H. C. Chang, *J. Food Prot.*, 2011, **74**, 651–657.
- 7 O. O. Ferreira, S. H. M. da Silva, M. S. de Oliveira and E. H. de A. Andrade, *Molecules*, 2021, **26**, 7259.
- 8 J.-B. Gou, Z.-Q. Li, C.-F. Li, F.-F. Chen, S.-Y. Lv and Y.-S. Zhang, *Plant Physiology and Biochemistry*, 2016, **106**, 288–294.
- 9 A. Ricciardelli, A. Casillo, R. Papa, D. M. Monti, P. Imbimbo, G. Vrenna, M. Artini, L. Selan, M. M. Corsaro and M. L. Tutino, *Biofouling*, 2018, **34**, 1110–1120.
- 10 T. Ould Bellahcen, M. Cherki, J. A. C. Sánchez, A. Cherif and A. El Amrani, *Journal of Essential Oil Bearing Plants*, 2019, **22**, 1265–1276.
- 11 T. Valadbeigi and S. Rashki, *Journal of Basic Research in Medical Sciences*, 2015, **2**, 1–11.
- 12 A. T. Mbaveng, Q. Zhao and V. Kuete, in *Toxicological Survey of African Medicinal Plants*, Elsevier, 2014, pp. 577–609.
- 13 J. K. Mali, Y. B. Sutar, A. R. Pahelkar, P. M. Verma and V. N. Telvekar, *Chem. Biol. Drug Des.*, 2020, **95**, 174–181.
- 14 A. M. M. Youssef, D. A. M. Maaty and Y. M. Al-Saraireh, *Molecules*, 2023, **28**, 630.
- 15 Z. Dashtizadeh and Z. Toluei, DOI:10.21203/rs.3.rs-3328206/v1.
- 16 M. T. Shaaban, M. F. Ghaly and S. M. Fahmi, *J. Basic Microbiol.*, 2021, **61**, 557–568.
- 17 S. Arora, G. Kumar and S. Meena, *Asian J. Pharm. Clin. Res*, 2017, **10**, 64–69.
- 18 L. Bao, H. Sun, Y. Zhao, L. Feng, K. Wu, S. Shang, J. Xu, R. Shan, S. Duan and M. Qiu, *PLoS Pathog.*, 2023, **19**, e1011764.
- 19 M. T. Islam, E. S. Ali, S. J. Uddin, S. Shaw, M. A. Islam, M. I. Ahmed, M. C. Shill, U. K. Karmakar, N. S. Yarla and I. N. Khan, *Food and chemical toxicology*, 2018, **121**, 82–94.
- 20 C. Sivaraj, R. Abhirami, M. Deepika, V. Sowmiya, K. Saraswathi and P. Arumugam, *Journal of Drug Delivery and Therapeutics*, 2019, **9**, 68–77.
- 21 A. Khiralla, R. Spina, M. Varbanov, S. Philippot, P. Lemièrre, S. Slezack-Deschaumes, P. André, I. Mohamed, S. M. Yagi and D. Laurain-Mattar, *Microorganisms*, 2020, **8**, 1353.

- 22 A. A. Hamid, M. A. Aliyu, L. Z. Abubakar, A. A. Mukadam, A. Shehu, G. Egharevba, M. J. Adisa, S. O. Ajibade, A. O. Zubair and E. O. Fagbohun, *Ife Journal of Science*, 2017, **19**, 409–416.
- 23 E. N. Sholkamy, P. Muthukrishnan, N. Abdel-Raouf, X. Nandhini, I. B. M. Ibraheem and A. A. Mostafa, *Saudi J. Biol. Sci.*, 2020, **27**, 3208–3220.
- 24 M. Ghavam, A. Afzali and M. L. Manca, *Sci. Rep.*, 2021, **11**, 8027.
- 25 A. Arya, S. Kumar, D. Kain, V. Vandana and K. Mikawlawng, *Journal of Herbmed Pharmacology*, 2024, **13**, 407–419.
- 26 R. Ahmad, C. K. Lim, N. F. Marzuki, Y.-K. Goh, K. A. Azizan, Y. K. Goh, K. J. Goh, A. B. Ramzi and S. N. Baharum, *Molecules*, 2020, **25**, 5965.
- 27 L. Huang, X. Zhu, S. Zhou, Z. Cheng, K. Shi, C. Zhang and H. Shao, *Toxins (Basel)*, 2021, **13**, 495.
- 28 Y. W. Heng, J. J. Ban, K. S. Khoo and N. W. Sit, *Ind. Crops Prod.*, 2020, **153**, 112612.
- 29 I. B. Momodu, E. S. Okungbowa, B. O. Agoreyo and M. M. Maliki, *Niger. J. Biotechnol.*, 2022, **38**, 25–38.
- 30 S. A. Lakshmi, J. P. Bhaskar, V. Krishnan, S. Sethupathy, S. Pandipriya, W. Aruni and S. K. Pandian, *J. Biotechnol.*, 2020, **317**, 59–69.
- 31 B. M. Ousman, O. Belmehdi, I. Boussaoudi, B. B. Otchom and S. Younes, *International Journal of Secondary Metabolite*, 2025, **12**, 429–447.
- 32 J. I. Achika, R. G. Ayo, J. D. Habila and A. O. Oyewale, *Sci. Afr.*, 2020, **10**, e00552.
- 33 P. A. Jiko, M. Mohammad, F. T. Richi, M. A. Islam, S. Alam, M. A. Taher, C. Shao, S. Wang, P. Geng and A. Al Mamun, *J. Inflamm. Res.*, 2024, 5821–5854.
- 34 S. Khatua, A. Pandey and S. J. Biswas, *J. Pharmacogn. Phytochem.*, 2016, **5**, 410–413.
- 35 L. P. Luhata and T. Usuki, *Bioorg. Med. Chem. Lett.*, 2021, **48**, 128248.
- 36 S. Khatua, A. Pandey and S. J. Biswas, *J. Pharmacogn. Phytochem.*, 2016, **5**, 410–413.
- 37 G. T. Siwe, R. Maharjan, A. P. Amang, C. Mezui, E. N. Zondegoumba, S. S. Akhtar, M. I. Choudhary and P. V. Tan, *J. Pharm. Pharmacogn. Res.*, 2020, **8**, 135–145.
- 38 L. Hernández-Vázquez, J. Palazón Barandela and A. Navarro-Ocaña, *Chapter 23 in: Rao, Venketeshwer. 2012. Phytochemicals: A Global Perspective of Their Role in Nutrition and Health. IntechOpen. ISBN: 978-953-51-4317-8. DOI: 10.5772/1387 pp: 487-502.*
- 39 S. Johann, C. Soldi, J. P. Lyon, M. G. Pizzolatti and M. A. Resende, *Lett. Appl. Microbiol.*, 2007, **45**, 148–153.
- 40 L. Salih, F. Eid, M. Elhaw and A. Hamed, *Egypt. J. Chem.*, 2021, **64**, 7157–7163.
